# Supplementary material for: A stemness-based signature with inspiring indications in discriminating the prognosis, immune response, and somatic mutation of endometrial cancer patients revealed by machine learning
Source: Aging (Albany NY). 2024 Jul 30;16(14):11248–74. doi: 10.18632/aging.205979 (PMC11315399; doi:10.18632/aging.205979)
Supplement: Supplementary Figures [file aging-16-205979-s001.pdf]

SUPPLEMENTARY FIGURES

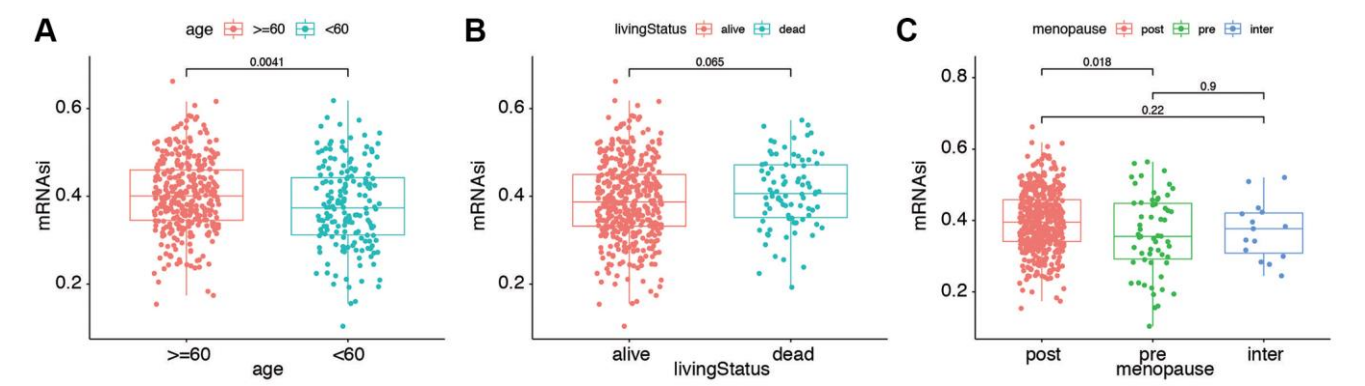

Supplementary Figure 1. (A–C) Distribution of mRNAi in different age, living status, and menopausal status.

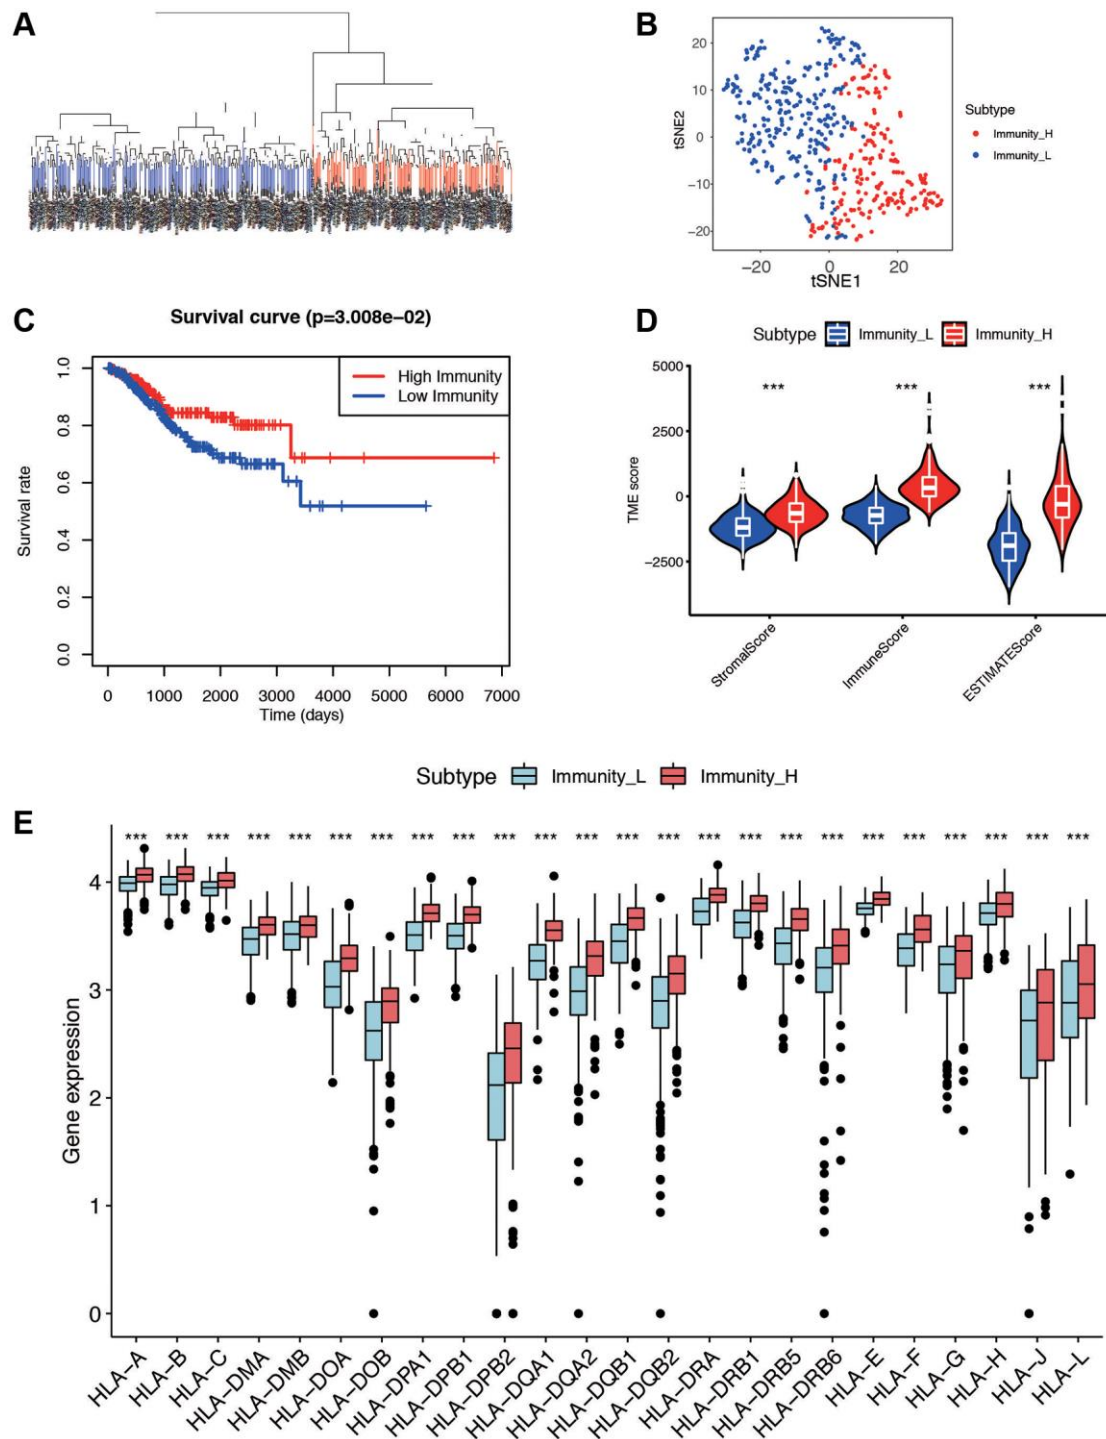

**Supplementary Figure 2.** (A) Unsupervised clustering for 514 EC patients from the TCGA-EC cohort. Patients were classified into two cohort according to the transcriptome data. (B) PCA analysis of the two clusters based on the ssGSEA. (C) Kaplan-Meier Survival analysis indicates that the two clusters had significantly different survival rates ( $p = 0.03$ ). (D) Difference in Stromal score, Immune score, and ESTIMATE score of samples from two clusters. (E) Comparison of the expression levels of HLA genes between two clusters in TCGA.

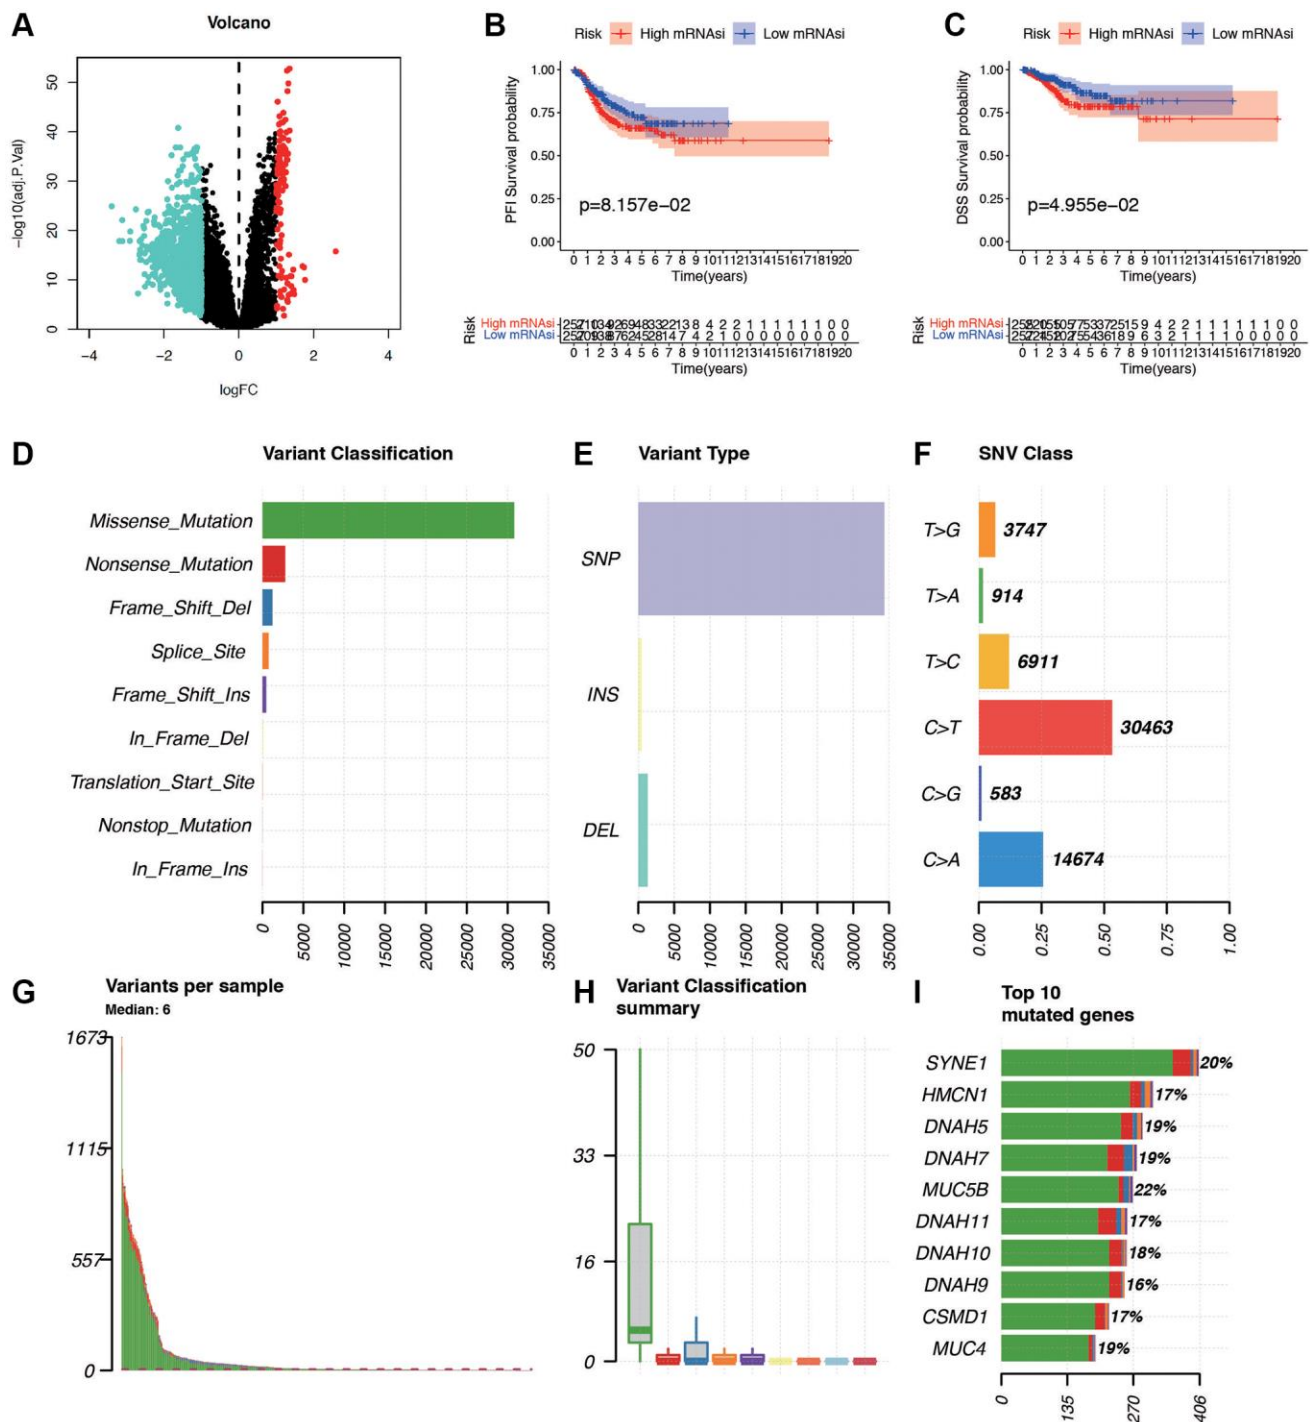

**Supplementary Figure 3.** (A) Volcano plot showing the DEGs between low and high mRNAsi groups. (B, C) PFS and DSS analysis of patients in different mRNAsi groups. (D) Classification and frequency of mutation types. (E) Frequency of variant types. (F) Frequency of SNV classes. (G, H) Tumor mutation burden in specific samples. (I) The top 10 mutated genes in EC samples.

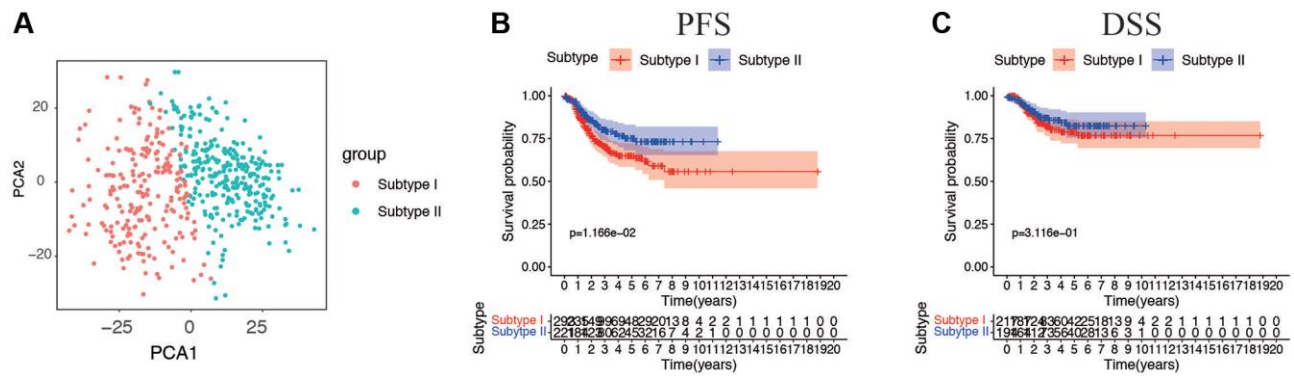

**Supplementary Figure 4.** (A) PCA analysis of patients in Stemness Subtype I and Subtype II. (B, C) PFS and DSS for patients in different subtypes. The difference is significant in PFS ( $p = 0.011$ ) but not in DSS ( $p > 0.05$ ).

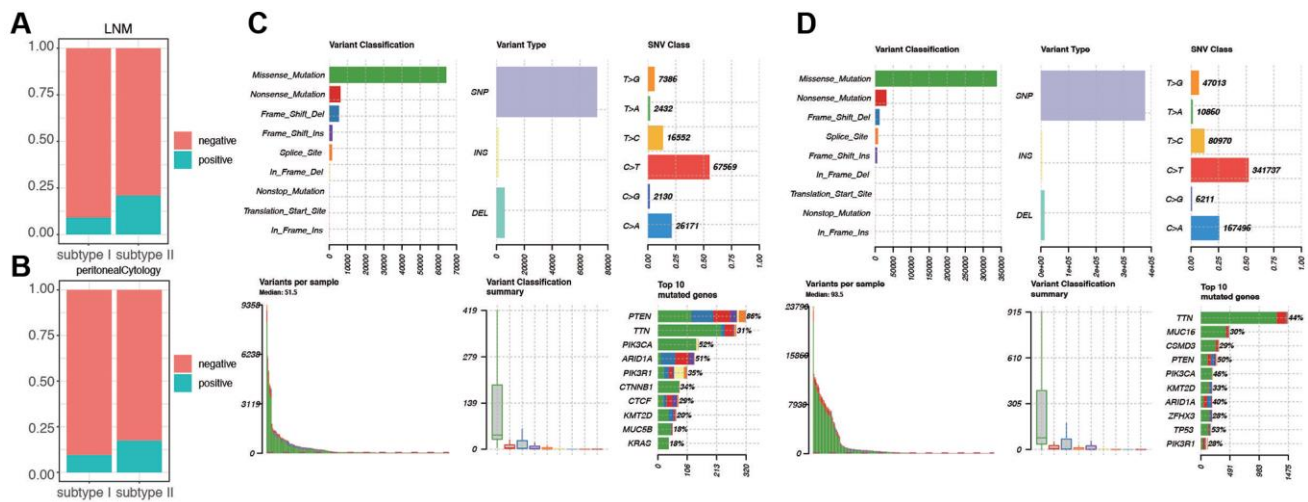

**Supplementary Figure 5.** (A, B) Proportions of different lymph node metastasis (LNM) and peritoneal cytology in subtype I and subtype II. (C, D) Cohort summary plot displaying distribution of variants according to variant classification, type and SNV class in subtype I and subtype II. Bottom part (from left to right) indicates mutation load for each sample, variant classification type. A stacked bar plot shows top ten mutated genes.

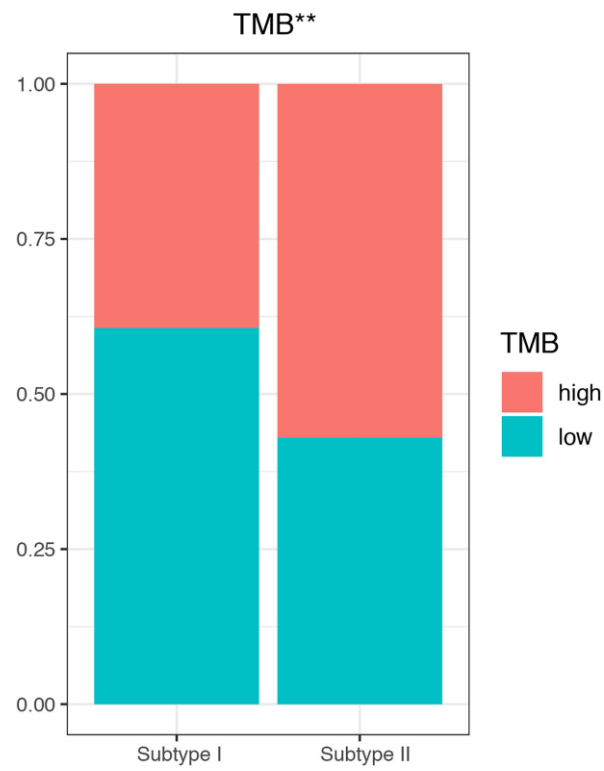

**Supplementary Figure 6. Proportions of low and high-TMB in different subtype.**

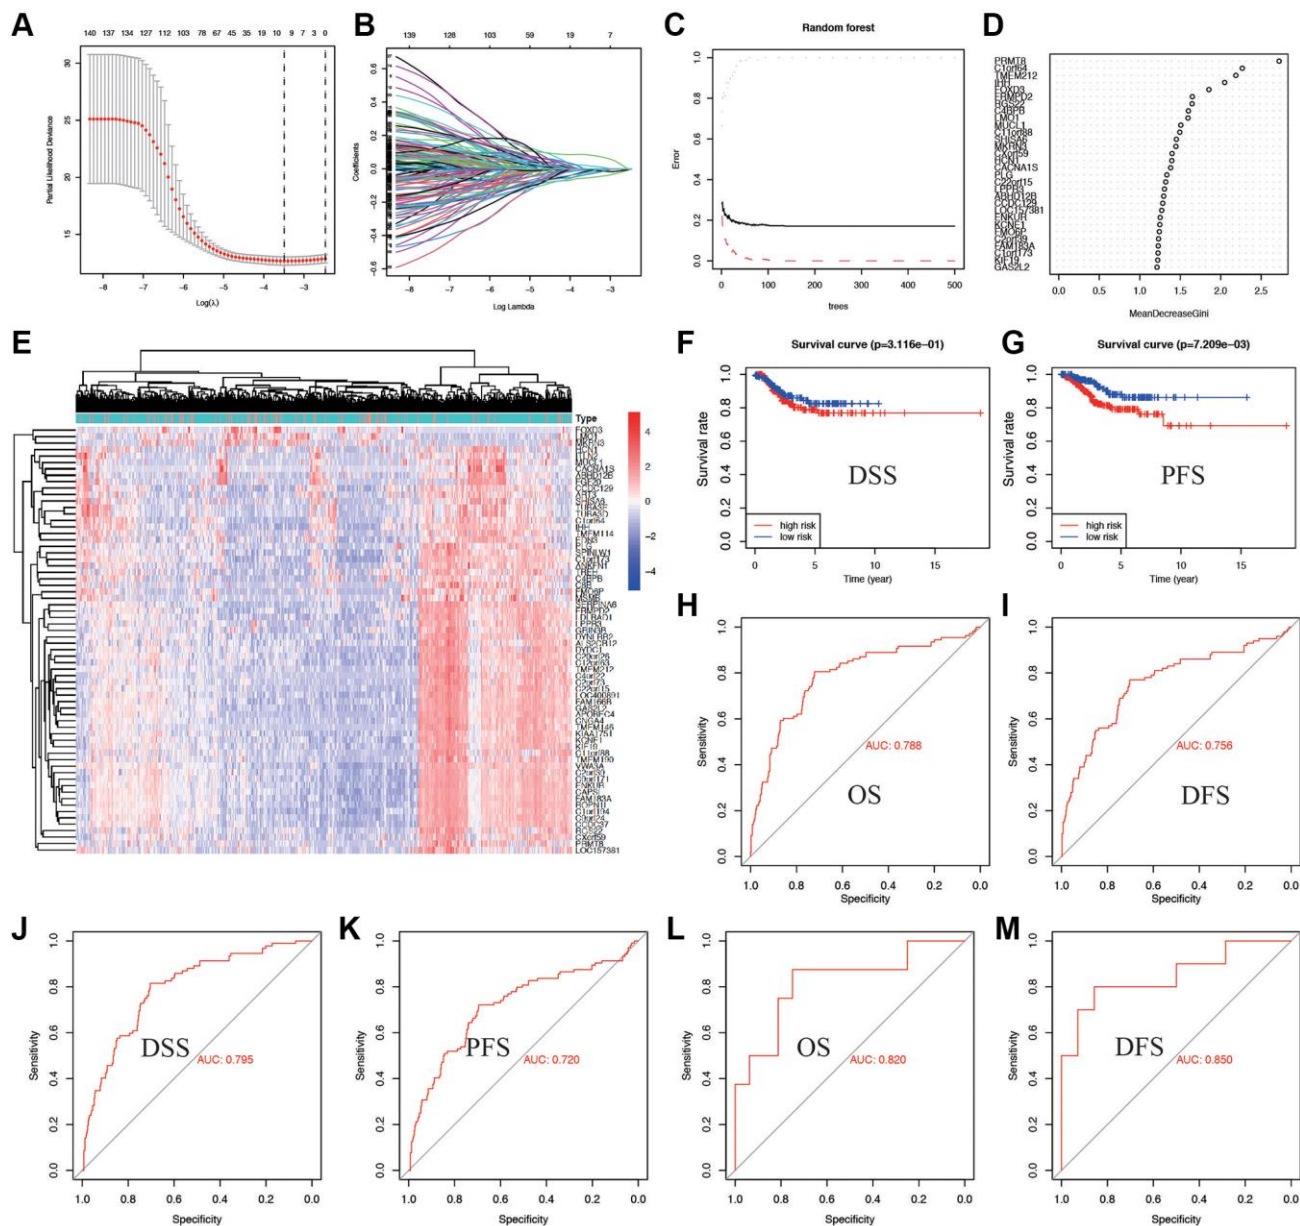

**Supplementary Figure 7.** (A) Distribution of LASSO coefficients for 145 related genes. (B) Plots of the cross-validation error rates. The dashes signify the value of the minimal error and greater  $\lambda$  value. (C, D) Error and mean decrease Gini value of random forest analysis. (E) Heatmap of selected genes in different group by RF. (F, G) Based on the Kaplan-Meier survival analysis, DSS and PFS was significantly higher in the low-risk score group than the high groups. (H–K) Area under the ROC curve of OS (AUC = 0.788), DFS (AUC = 0.756), PFS (AUC = 0.795), and DSS (AUC = 0.720) in TCGA cohort. (L, M) Area under the ROC curve of OS (AUC = 0.820), DFS (AUC = 0.850) in cohort in our hospital.

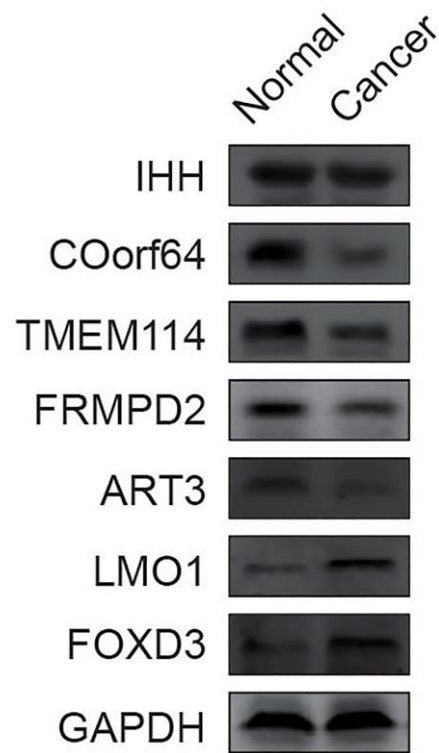

**Supplementary Figure 8.** Validation of the expression of the 7 genes in normal endometrium and endometrial cancer tissues by western blot.
