# Supplementary material for: A stemness-based signature with inspiring indications in discriminating the prognosis, immune response, and somatic mutation of endometrial cancer patients revealed by machine learning
Source: Aging (Albany NY). 2024 Jul 30;16(14):11248–74. doi: 10.18632/aging.205979 (PMC11315399; doi:10.18632/aging.205979)
Supplement: Supplementary File 3 [file aging-16-205979-s005.xlsx]

## Sheet: 3-ESTIMATE
Supplementary File 3. ESTIMATE score for each patient in TCGA.
ID	StromalScore	ImmuneScore	ESTIMATEScore	TumorPurity
TCGA-2E-A9G8-01	-1686.05	-363.492	-2049.54	0.954105
TCGA-4E-A92E-01	-690.478	258.419	-432.059	0.856903
TCGA-5B-A90C-01	-1193.91	-1019.53	-2213.44	0.961033
TCGA-5S-A9Q8-01	-1167.73	-687.168	-1854.9	0.945161
TCGA-A5-A0G1-01	-685.458	2238.35	1552.89	0.672708
TCGA-A5-A0G2-01	-903.921	164.144	-739.777	0.879304
TCGA-A5-A0G5-01	-101.104	2120.56	2019.46	0.620497
TCGA-A5-A0G9-01	-1190.27	-60.9096	-1251.18	0.912546
TCGA-A5-A0GB-01	-1601.97	-907.604	-2509.57	0.972138
TCGA-A5-A0GD-01	-1656.3	37.519	-1618.79	0.933276
TCGA-A5-A0GE-01	-344.677	-461.235	-805.912	0.883886
TCGA-A5-A0GG-01	-326.529	-47.6694	-374.198	0.852494
TCGA-A5-A0GH-01	-1805.83	-1309.07	-3114.9	0.989104
TCGA-A5-A0GI-01	-1102.24	-440.538	-1542.78	0.92921
TCGA-A5-A0GJ-01	-323.561	429.192	105.631	0.813592
TCGA-A5-A0GM-01	-719.178	-740.513	-1459.69	0.924635
TCGA-A5-A0GN-01	-528.192	738.325	210.134	0.804578
TCGA-A5-A0GP-01	-1253.38	-548.21	-1801.59	0.942576
TCGA-A5-A0GQ-01	-1010.9	693.085	-317.812	0.848138
TCGA-A5-A0GR-01	-139.883	1312.08	1172.19	0.712984
TCGA-A5-A0GU-01	-953.277	-73.8754	-1027.15	0.898607
TCGA-A5-A0GV-01	-1752.26	-1240.93	-2993.19	0.986316
TCGA-A5-A0GW-01	100.045	911.674	1011.72	0.729302
TCGA-A5-A0GX-01	92.0928	307.633	399.725	0.787742
TCGA-A5-A0R7-01	171.737	251.373	423.109	0.785622
TCGA-A5-A0R8-01	-521.893	514.742	-7.15142	0.823106
TCGA-A5-A0R9-01	-452.088	22.972	-429.116	0.85668
TCGA-A5-A0RA-01	-1251.91	-340.365	-1592.28	0.931871
TCGA-A5-A0VO-01	-522.896	-361.619	-884.515	0.889224
TCGA-A5-A0VP-01	-1508.41	-444.78	-1953.19	0.949775
TCGA-A5-A0VQ-01	-1016.02	-116.374	-1132.39	0.905277
TCGA-A5-A1OF-01	-846.279	1246.63	400.348	0.787685
TCGA-A5-A1OH-01	-561.217	-1828.39	-2389.61	0.96786
TCGA-A5-A1OJ-01	638.657	566.814	1205.47	0.70955
TCGA-A5-A1OK-01	-650.341	-334.207	-984.548	0.895845
TCGA-A5-A2K2-01	-1918.08	-914.391	-2832.47	0.982152
TCGA-A5-A2K3-01	79.7665	3206.36	3286.13	0.464831
TCGA-A5-A2K4-01	-605.664	-613.64	-1219.3	0.910623
TCGA-A5-A2K5-01	-848.848	-11.3759	-860.224	0.887587
TCGA-A5-A2K7-01	-910.425	-319.374	-1229.8	0.911258
TCGA-A5-A3LO-01	-1240.15	-744.317	-1984.47	0.951201
TCGA-A5-A3LP-01	-1230.76	-229.794	-1460.55	0.924683
TCGA-A5-A7WJ-01	-2204.47	-1237.23	-3441.7	0.995026
TCGA-A5-A7WK-01	-1307.35	-918.901	-2226.25	0.961552
TCGA-A5-AB3J-01	372.216	51.8207	424.037	0.785538
TCGA-AJ-A23M-01	-892.634	-801.977	-1694.61	0.937215
TCGA-AJ-A23N-01	188.644	-97.1349	91.5091	0.814796
TCGA-AJ-A23O-01	-490.767	583.029	92.2617	0.814732
TCGA-AJ-A2QK-01	-239.447	724.874	485.427	0.77993
TCGA-AJ-A2QM-01	-1426.04	-1244.48	-2670.53	0.977404
TCGA-AJ-A2QN-01	-891.403	-851.365	-1742.77	0.939657
TCGA-AJ-A2QO-01	-1334.31	-785.35	-2119.66	0.957137
TCGA-AJ-A3BG-01	-1807.4	-611.646	-2419.04	0.968937
TCGA-AJ-A3BI-01	-1012.68	485.646	-527.034	0.864005
TCGA-AJ-A3BK-01	-868.454	561.729	-306.725	0.847274
TCGA-AJ-A3EK-01	-405.104	283.884	-121.22	0.832499
TCGA-AJ-A3EL-01	-471.605	245.003	-226.602	0.840969
TCGA-AJ-A3EM-01	-1317.97	-1635.26	-2953.23	0.985332
TCGA-AJ-A3I9-01	-1408.47	-1034.76	-2443.23	0.969809
TCGA-AJ-A3IA-01	62.7717	0.0114012	62.7831	0.817233
TCGA-AJ-A3NC-01	-1304.73	-558.902	-1863.63	0.945579
TCGA-AJ-A3NE-01	-992.028	26.8157	-965.212	0.89458
TCGA-AJ-A3NG-01	-1099.38	-1456.8	-2556.18	0.973719
TCGA-AJ-A3NH-01	-1084.1	-1438.27	-2522.37	0.972576
TCGA-AJ-A3OJ-01	-696.981	70.025	-626.956	0.871297
TCGA-AJ-A3OK-01	674.94	761.253	1436.19	0.685283
TCGA-AJ-A3OL-01	-1727.06	-1590.03	-3317.1	0.993037
TCGA-AJ-A3TW-01	-1047.01	992.119	-54.894	0.827066
TCGA-AJ-A5DV-01	-1416.08	7.27495	-1408.81	0.921764
TCGA-AJ-A5DW-01	-609.141	-746.474	-1355.62	0.918708
TCGA-AJ-A6NU-01	-704.586	351.009	-353.577	0.850907
TCGA-AJ-A8CT-01	-247.927	1140.38	892.457	0.741167
TCGA-AJ-A8CV-01	-951.604	173.794	-777.81	0.88195
TCGA-AP-A051-01	-1046.25	-304.076	-1350.32	0.918401
TCGA-AP-A052-01	-609.974	-256.935	-866.908	0.888039
TCGA-AP-A053-01	-1388.93	-1108.31	-2497.24	0.971712
TCGA-AP-A056-01	5.10268	47.8537	52.9563	0.818063
TCGA-AP-A059-01	-547.233	1638.38	1091.14	0.721276
TCGA-AP-A05A-01	-1450.9	-1323.5	-2774.41	0.980514
TCGA-AP-A05H-01	-627.825	-1075.04	-1702.86	0.937637
TCGA-AP-A05J-01	-1391.42	-1107.86	-2499.27	0.971782
TCGA-AP-A05N-01	-751.045	-929.648	-1680.69	0.936501
TCGA-AP-A05O-01	-1254.28	156.569	-1097.71	0.903103
TCGA-AP-A05P-01	-571.706	-388.071	-959.777	0.894223
TCGA-AP-A0L9-01	-1738.09	-805.613	-2543.7	0.9733
TCGA-AP-A0LD-01	-1021.04	-848.992	-1870.03	0.945884
TCGA-AP-A0LE-01	-1221.86	-588.083	-1809.94	0.942985
TCGA-AP-A0LG-01	-1691.24	-936.684	-2627.92	0.976063
TCGA-AP-A0LH-01	-1557.59	-479.89	-2037.48	0.953574
TCGA-AP-A0LJ-01	-758.733	290.446	-468.287	0.859632
TCGA-AP-A0LL-01	-830.684	-319.478	-1150.16	0.906382
TCGA-AP-A0LN-01	-1176.75	-279.033	-1455.78	0.924416
TCGA-AP-A0LO-01	-1089.62	-679.887	-1769.51	0.940993
TCGA-AP-A0LP-01	-1080.5	257.289	-823.211	0.885071
TCGA-AP-A0LS-01	-1052.65	-710.786	-1763.44	0.940691
TCGA-AP-A0LT-01	-1966.73	-917.648	-2884.37	0.983557
TCGA-AP-A0LV-01	-492.837	-410.647	-903.484	0.890494
TCGA-AP-A1DH-01	-875.67	629.931	-245.739	0.842486
TCGA-AP-A1DK-01	-638.934	359.875	-279.059	0.84511
TCGA-AP-A1DM-01	-1146.21	-808.012	-1954.22	0.949822
TCGA-AP-A1DO-01	-2396.62	-870.041	-3266.66	0.992138
TCGA-AP-A1DP-01	-1694.22	-819.922	-2514.14	0.972295
TCGA-AP-A1DV-01	-1690.45	-811.286	-2501.73	0.971868
TCGA-AP-A1E1-01	-1504.47	-212.384	-1716.85	0.938349
TCGA-AP-A1E4-01	-1004.01	-1614.95	-2618.95	0.975776
TCGA-AW-A1PO-01	-1429.6	-1253.56	-2683.16	0.977795
TCGA-AX-A05T-01	-937	-476.963	-1413.96	0.922057
TCGA-AX-A05U-01	-960.41	-1026.41	-1986.82	0.951308
TCGA-AX-A05W-01	-1245.39	566.046	-679.349	0.875045
TCGA-AX-A05Y-01	-1535.65	-829.389	-2365.03	0.966946
TCGA-AX-A05Z-01	-495.605	1482.74	987.136	0.731766
TCGA-AX-A060-01	-1893.03	-915.01	-2808.04	0.981472
TCGA-AX-A062-01	-1019.5	-1097.49	-2116.99	0.957024
TCGA-AX-A063-01	-489.664	1098.08	608.412	0.768505
TCGA-AX-A064-01	-983.232	-552.199	-1535.43	0.928812
TCGA-AX-A06B-01	-251.217	-113.658	-364.875	0.851777
TCGA-AX-A06D-01	-1929.53	-680.286	-2609.81	0.975482
TCGA-AX-A06H-01	28.6759	1650.17	1678.84	0.658914
TCGA-AX-A06J-01	-1981.83	56.4016	-1925.42	0.948491
TCGA-AX-A06L-01	-231.005	324.762	93.7575	0.814604
TCGA-AX-A0IS-01	-966.182	-607.952	-1574.13	0.930902
TCGA-AX-A0IW-01	-1142.23	-663.036	-1805.26	0.942756
TCGA-AX-A0IZ-01	-386.559	811.639	425.08	0.785443
TCGA-AX-A0J0-01	-1266.1	-881.937	-2148.03	0.958335
TCGA-AX-A0J1-01	-1180.12	-293.121	-1473.25	0.92539
TCGA-AX-A1C4-01	-1848.78	-1527.34	-3376.12	0.994021
TCGA-AX-A1C9-01	-994.304	-34.4639	-1028.77	0.898711
TCGA-AX-A1CA-01	-1324.66	-368.71	-1693.37	0.937152
TCGA-AX-A1CC-01	814.925	913.494	1728.42	0.653423
TCGA-AX-A1CE-01	-1665.06	-953.555	-2618.62	0.975765
TCGA-AX-A1CF-01	-1344.31	-822.66	-2166.97	0.959126
TCGA-AX-A1CI-01	-1739.94	-784.264	-2524.21	0.972639
TCGA-AX-A1CJ-01	-1116.96	312.959	-803.996	0.883755
TCGA-AX-A1CK-01	-1426.89	-1387.79	-2814.68	0.981658
TCGA-AX-A1CN-01	-1116.87	-1330.38	-2447.25	0.969953
TCGA-AX-A1CP-01	-856.108	-549.084	-1405.19	0.921558
TCGA-AX-A1CR-01	-1052.96	-138.372	-1191.33	0.908918
TCGA-AX-A2H2-01	-1291.47	130.901	-1160.57	0.907026
TCGA-AX-A2H4-01	-231.123	1713.77	1482.65	0.680301
TCGA-AX-A2H5-01	-1708.51	-761.829	-2470.34	0.970772
TCGA-AX-A2H8-01	-1315.26	-439.618	-1754.88	0.940264
TCGA-AX-A2HA-01	-1447.05	-248.709	-1695.76	0.937274
TCGA-AX-A2HC-01	-1439.93	-1343.13	-2783.06	0.980762
TCGA-AX-A2HF-01	-1685.37	-542.073	-2227.44	0.9616
TCGA-AX-A2HG-01	-1156.28	-105.129	-1261.41	0.913159
TCGA-AX-A2HH-01	-1703.29	-1594.82	-3298.12	0.992705
TCGA-AX-A2HJ-01	-99.6484	-461.08	-560.728	0.866485
TCGA-AX-A2IN-01	92.1497	-78.9086	13.241	0.821402
TCGA-AX-A2IO-01	-451.032	-602.459	-1053.49	0.900296
TCGA-AX-A3FW-01	-1795.26	-1025.41	-2820.68	0.981825
TCGA-AX-A3FX-01	-831.948	-255.723	-1087.67	0.902469
TCGA-AX-A3G1-01	-937.606	451.263	-486.343	0.860983
TCGA-AX-A3G3-01	-424.056	1169.96	745.902	0.755436
TCGA-AX-A3G8-01	-1850.74	-950.556	-2801.3	0.981282
TCGA-AX-A3GB-01	-643.412	29.5337	-613.878	0.870353
TCGA-B5-A0JN-01	-1346.77	-1256.3	-2603.06	0.975263
TCGA-B5-A0JR-01	-799.889	-128.25	-928.14	0.892135
TCGA-B5-A0JS-01	-541.483	500.825	-40.6582	0.825889
TCGA-B5-A0JT-01	-973.83	-556.628	-1530.46	0.928541
TCGA-B5-A0JU-01	-1576.56	-1028.93	-2605.49	0.975342
TCGA-B5-A0JV-01	-1531.11	-807.951	-2339.06	0.965967
TCGA-B5-A0JX-01	-567.497	238.344	-329.153	0.849019
TCGA-B5-A0K0-01	-149.816	578.899	429.082	0.78508
TCGA-B5-A0K1-01	-1544.21	-1027.17	-2571.38	0.974225
TCGA-B5-A0K2-01	-344.632	1262.75	918.119	0.738633
TCGA-B5-A0K3-01	-1552.74	-370.601	-1923.34	0.948394
TCGA-B5-A0K4-01	-1369.65	-696.696	-2066.35	0.954841
TCGA-B5-A0K6-01	-846.774	324.901	-521.873	0.863624
TCGA-B5-A0K7-01	-860.329	412.162	-448.167	0.858119
TCGA-B5-A0K8-01	-1006.07	-314.619	-1320.69	0.916672
TCGA-B5-A0K9-01	-1174.57	-16.0867	-1190.65	0.908877
TCGA-B5-A0KB-01	-449.456	642.722	193.266	0.806046
TCGA-B5-A11E-01	-1264.53	-868.726	-2133.26	0.957713
TCGA-B5-A11F-01	-841.458	-857.314	-1698.77	0.937428
TCGA-B5-A11G-01	-941.493	-16.5699	-958.063	0.894111
TCGA-B5-A11H-01	-533.208	443.171	-90.037	0.829954
TCGA-B5-A11I-01	-765.712	939.68	173.967	0.807719
TCGA-B5-A11J-01	-1271	-355.4	-1626.4	0.933676
TCGA-B5-A11L-01	-340.855	578.227	237.372	0.802197
TCGA-B5-A11M-01	426.909	-501.49	-74.5812	0.828686
TCGA-B5-A11N-01	-270.613	1606.18	1335.57	0.695965
TCGA-B5-A11O-01	-155.43	149.28	-6.14994	0.823022
TCGA-B5-A11P-01	-1644.98	-1040.39	-2685.36	0.977862
TCGA-B5-A11Q-01	-1932.99	-1350.32	-3283.31	0.992441
TCGA-B5-A11R-01	-1340.82	-499.531	-1840.35	0.944461
TCGA-B5-A11S-01	-674.557	-390.527	-1065.08	0.901036
TCGA-B5-A11U-01	650.511	-308.1	342.411	0.792896
TCGA-B5-A11V-01	-1034.07	-895.692	-1929.76	0.948693
TCGA-B5-A11W-01	-733.998	-581.091	-1315.09	0.916343
TCGA-B5-A11Y-01	-797.044	1113.94	316.897	0.795173
TCGA-B5-A11Z-01	-1316.84	-937.742	-2254.59	0.962685
TCGA-B5-A121-01	-1090.94	-692.169	-1783.11	0.941667
TCGA-B5-A1MR-01	-257.669	2168.14	1910.47	0.632963
TCGA-B5-A1MS-01	-1302.81	-1278.96	-2581.77	0.974568
TCGA-B5-A1MU-01	421.186	699.485	1120.67	0.718267
TCGA-B5-A1MV-01	-920.376	-369.51	-1289.89	0.914855
TCGA-B5-A1MW-01	-1656.66	-1271.82	-2928.48	0.984706
TCGA-B5-A1MX-01	-749.794	-63.6848	-813.479	0.884405
TCGA-B5-A1MZ-01	-610.638	200.727	-409.911	0.855222
TCGA-B5-A3F9-01	-715.438	-234.721	-950.16	0.893591
TCGA-B5-A3FA-01	-1365.68	-604.78	-1970.46	0.950565
TCGA-B5-A3FB-01	-1586.06	-546.754	-2132.82	0.957695
TCGA-B5-A3FC-01	-224.42	698.664	474.244	0.780956
TCGA-B5-A3FD-01	-754.236	-740.178	-1494.41	0.926564
TCGA-B5-A3FH-01	-1405.22	-385.995	-1791.22	0.942067
TCGA-B5-A5OC-01	232.698	1076.67	1309.37	0.698722
TCGA-B5-A5OD-01	-947.407	214.517	-732.89	0.878823
TCGA-BG-A0LW-01	-1395.35	-467.724	-1863.07	0.945552
TCGA-BG-A0LX-01	-308.517	-267.273	-575.79	0.867587
TCGA-BG-A0M0-01	-1339.5	-1190.94	-2530.45	0.972852
TCGA-BG-A0M2-01	-1179.65	-395.292	-1574.94	0.930945
TCGA-BG-A0M3-01	-1588.72	-727.793	-2316.51	0.965105
TCGA-BG-A0M4-01	-761.111	-167.537	-928.647	0.892169
TCGA-BG-A0M7-01	-745.034	134.814	-610.22	0.870089
TCGA-BG-A0M8-01	631.704	1673.4	2305.1	0.58708
TCGA-BG-A0M9-01	-1092.29	-742.024	-1834.32	0.94417
TCGA-BG-A0MA-01	-551.415	-682.855	-1234.27	0.911528
TCGA-BG-A0MC-01	-417.339	607.581	190.241	0.806308
TCGA-BG-A0MG-01	-1425.52	-231.895	-1657.41	0.935297
TCGA-BG-A0MH-01	222.967	668.157	891.124	0.741298
TCGA-BG-A0MI-01	-1096.68	-151.081	-1247.76	0.912341
TCGA-BG-A0MK-01	-730.827	-434.566	-1165.39	0.907324
TCGA-BG-A0MO-01	-1547.74	222.884	-1324.85	0.916916
TCGA-BG-A0MQ-01	-1515.53	-948.428	-2463.96	0.970547
TCGA-BG-A0MS-01	-955.45	-255.163	-1210.61	0.910095
TCGA-BG-A0MT-01	-635.8	64.4898	-571.31	0.867259
TCGA-BG-A0MU-01	-1146.68	252.476	-894.204	0.889874
TCGA-BG-A0RY-01	-1136.08	23.0758	-1113	0.904064
TCGA-BG-A0VT-01	-450.935	-404.806	-855.741	0.887284
TCGA-BG-A0VV-01	-851.047	-246.166	-1097.21	0.903071
TCGA-BG-A0VW-01	-724.615	312.876	-411.739	0.855361
TCGA-BG-A0VX-01	-578.649	449.843	-128.806	0.833115
TCGA-BG-A0VZ-01	-781.973	59.3083	-722.664	0.878105
TCGA-BG-A0W1-01	-1282.03	-410.713	-1692.75	0.93712
TCGA-BG-A0W2-01	-597.007	-282.288	-879.296	0.888873
TCGA-BG-A0YU-01	-1006.9	-968.675	-1975.57	0.950798
TCGA-BG-A0YV-01	-1198.84	-1063.87	-2262.71	0.963007
TCGA-BG-A186-01	-755.813	-249.881	-1005.69	0.89722
TCGA-BG-A187-01	-787.96	-276.164	-1064.12	0.900974
TCGA-BG-A18A-01	25.5204	-80.3334	-54.813	0.827059
TCGA-BG-A18B-01	-1138.95	86.4963	-1052.46	0.90023
TCGA-BG-A18C-01	-1290.22	-459.023	-1749.24	0.939982
TCGA-BG-A220-01	-1719.56	-1423.73	-3143.28	0.989709
TCGA-BG-A221-01	-656.595	524.073	-132.521	0.833417
TCGA-BG-A222-01	-1402.08	-370.466	-1772.55	0.941144
TCGA-BG-A2AD-01	-1112.16	-1704.28	-2816.44	0.981707
TCGA-BG-A2AE-01	-1141.11	330.459	-810.656	0.884212
TCGA-BG-A2L7-01	-388.847	442.866	54.0194	0.817974
TCGA-BG-A3EW-01	-1320.82	-902.015	-2222.83	0.961414
TCGA-BG-A3PP-01	-461.856	-995.252	-1457.11	0.92449
TCGA-BK-A0C9-01	-755.295	245.193	-510.102	0.862751
TCGA-BK-A139-01	-875.113	573.468	-301.645	0.846878
TCGA-BK-A139-02	16.3155	-484.943	-468.628	0.859657
TCGA-BK-A13B-01	-1355.49	-178.63	-1534.12	0.92874
TCGA-BK-A13C-01	-1279.79	-679.101	-1958.89	0.950036
TCGA-BK-A26L-01	38.53	-370.041	-331.511	0.849201
TCGA-BK-A4ZD-01	-1173.5	-1407.86	-2581.36	0.974554
TCGA-BK-A56F-01	-421.001	-490.656	-911.657	0.891039
TCGA-BK-A6W3-01	-825.291	349.564	-475.728	0.860189
TCGA-BK-A6W4-01	-181.097	-534.973	-716.07	0.877642
TCGA-BS-A0TC-01	-1527.37	-360.831	-1888.2	0.946746
TCGA-BS-A0TD-01	-1106.61	-289.424	-1396.03	0.921035
TCGA-BS-A0TE-01	-1298.34	-346.864	-1645.2	0.934661
TCGA-BS-A0TG-01	26.1513	277.278	303.429	0.79637
TCGA-BS-A0TI-01	-540.517	347.42	-193.097	0.838298
TCGA-BS-A0TJ-01	-763.972	-760.737	-1524.71	0.928227
TCGA-BS-A0U5-01	-1109.41	-867.636	-1977.05	0.950865
TCGA-BS-A0U7-01	-346.609	164.842	-181.767	0.83739
TCGA-BS-A0U9-01	-1597.18	-873.913	-2471.09	0.970798
TCGA-BS-A0UA-01	-182.393	527.554	345.161	0.79265
TCGA-BS-A0UF-01	-603.455	808.751	205.296	0.804999
TCGA-BS-A0UJ-01	-1120.48	300.258	-820.219	0.884867
TCGA-BS-A0UL-01	457.58	799.073	1256.65	0.704236
TCGA-BS-A0UM-01	-1178.37	879.271	-299.103	0.84668
TCGA-BS-A0UT-01	-638.619	-812.198	-1450.82	0.924138
TCGA-BS-A0V4-01	-839.694	-179.205	-1018.9	0.898074
TCGA-BS-A0V6-01	-1046.43	134.537	-911.892	0.891055
TCGA-BS-A0V7-01	554.717	1183.49	1738.2	0.652335
TCGA-BS-A0V8-01	-620.277	-68.0957	-688.373	0.875686
TCGA-BS-A0VI-01	-254.088	-453.257	-707.345	0.877027
TCGA-BS-A0WQ-01	-1512.54	-958.409	-2470.95	0.970793
TCGA-D1-A0ZN-01	-532.077	-270.519	-802.595	0.883659
TCGA-D1-A0ZO-01	-176.307	-36.9062	-213.214	0.839904
TCGA-D1-A0ZP-01	-854.244	-1077.07	-1931.31	0.948765
TCGA-D1-A0ZQ-01	-18.3942	-609.425	-627.819	0.871359
TCGA-D1-A0ZR-01	-1406.7	-1045.72	-2452.41	0.970137
TCGA-D1-A0ZS-01	-1029.36	-850.421	-1879.78	0.946348
TCGA-D1-A0ZU-01	-810.538	-1106.52	-1917.06	0.948102
TCGA-D1-A0ZV-01	-456.599	858.41	401.811	0.787553
TCGA-D1-A0ZZ-01	-1527.13	-1578.52	-3105.65	0.988903
TCGA-D1-A101-01	193.709	797.143	990.852	0.731394
TCGA-D1-A102-01	-541.941	-113.284	-655.224	0.873326
TCGA-D1-A103-01	-824.102	-104.301	-928.403	0.892153
TCGA-D1-A15V-01	-1223.23	-565.378	-1788.6	0.941938
TCGA-D1-A15X-01	-1556.59	759.349	-797.238	0.88329
TCGA-D1-A15Z-01	-1291.13	-762.257	-2053.39	0.954274
TCGA-D1-A160-01	-857.616	371.063	-486.553	0.860998
TCGA-D1-A161-01	-1324.99	-425.595	-1750.59	0.940049
TCGA-D1-A162-01	-1207.62	-489.726	-1697.34	0.937355
TCGA-D1-A165-01	-824.598	-948.158	-1772.76	0.941154
TCGA-D1-A167-01	-1725.16	-1188.9	-2914.07	0.984335
TCGA-D1-A168-01	-115.839	-664.576	-780.415	0.88213
TCGA-D1-A169-01	-44.9463	799.053	754.107	0.754646
TCGA-D1-A16B-01	-612.383	-20.3596	-632.743	0.871714
TCGA-D1-A16D-01	-749.316	115.602	-633.713	0.871783
TCGA-D1-A16E-01	-880.504	22.2917	-858.212	0.887451
TCGA-D1-A16F-01	-636.883	-184.68	-821.563	0.884959
TCGA-D1-A16G-01	-1821.49	-272.582	-2094.07	0.956043
TCGA-D1-A16I-01	-621.728	-416.84	-1038.57	0.89934
TCGA-D1-A16J-01	-900.774	660.71	-240.064	0.842037
TCGA-D1-A16N-01	-693.324	-282.345	-975.67	0.895265
TCGA-D1-A16O-01	-842.082	-1142.62	-1984.7	0.951212
TCGA-D1-A16Q-01	-450.357	288.096	-162.261	0.835821
TCGA-D1-A16R-01	-400.685	57.0037	-343.682	0.850143
TCGA-D1-A16X-01	-609.952	1003.17	393.215	0.78833
TCGA-D1-A16Y-01	-1100.73	-903.97	-2004.7	0.952114
TCGA-D1-A174-01	-117.269	1290.07	1172.8	0.712921
TCGA-D1-A175-01	-1213.16	-1086.13	-2299.29	0.96444
TCGA-D1-A176-01	-1348.71	-361.476	-1710.19	0.93801
TCGA-D1-A177-01	-1697.46	-1491.51	-3188.97	0.990646
TCGA-D1-A17A-01	-726.586	-276.646	-1003.23	0.89706
TCGA-D1-A17B-01	265.958	1473.42	1739.37	0.652205
TCGA-D1-A17C-01	445.322	220.343	665.665	0.763101
TCGA-D1-A17D-01	-894.131	379.731	-514.399	0.86307
TCGA-D1-A17F-01	-1226.97	394.683	-832.283	0.88569
TCGA-D1-A17H-01	-141.916	3.19303	-138.723	0.833919
TCGA-D1-A17K-01	-1783.68	-552.541	-2336.22	0.965859
TCGA-D1-A17L-01	-1087.08	595.859	-491.216	0.861346
TCGA-D1-A17M-01	-1195.09	-293.661	-1488.75	0.926251
TCGA-D1-A17N-01	103.665	803.307	906.972	0.739735
TCGA-D1-A17Q-01	-809.487	-1038.62	-1848.11	0.944835
TCGA-D1-A17R-01	-636.855	-577.655	-1214.51	0.910332
TCGA-D1-A17S-01	-1316.84	-469.622	-1786.46	0.941832
TCGA-D1-A17T-01	-1348.88	-113.448	-1462.32	0.924782
TCGA-D1-A1NS-01	-1422.15	-377.903	-1800.05	0.942501
TCGA-D1-A1NU-01	-1220.17	-361.13	-1581.3	0.931286
TCGA-D1-A1NY-01	-657.24	-460.916	-1118.16	0.904387
TCGA-D1-A1NZ-01	-1224.28	-58.0376	-1282.32	0.914406
TCGA-D1-A1O0-01	-1473.13	-914.785	-2387.92	0.967797
TCGA-D1-A1O5-01	-982.517	-347.104	-1329.62	0.917195
TCGA-D1-A1O7-01	-1606.98	-560.549	-2167.53	0.959149
TCGA-D1-A2G0-01	-1806.78	-144.87	-1951.65	0.949704
TCGA-D1-A2G7-01	-1058.75	-1179.17	-2237.92	0.962021
TCGA-D1-A3DG-01	-1643.08	-1318.22	-2961.3	0.985534
TCGA-D1-A3DH-01	-1654.64	-1249.03	-2903.68	0.984065
TCGA-D1-A3JP-01	-637.312	526.206	-111.106	0.831675
TCGA-DF-A2KN-01	-488.486	883.28	394.793	0.788187
TCGA-DF-A2KS-01	-1275.49	93.9675	-1181.53	0.908317
TCGA-DF-A2KU-01	-667.961	1352.37	684.407	0.76132
TCGA-DF-A2KV-01	-1319.47	429.891	-889.58	0.889564
TCGA-DF-A2KZ-01	-344.937	208.125	-136.812	0.833765
TCGA-DI-A0WH-01	-1469.21	-665.948	-2135.15	0.957793
TCGA-DI-A1BU-01	-977.596	-466.316	-1443.91	0.92375
TCGA-DI-A1BY-01	-247.289	319.623	72.334	0.816424
TCGA-DI-A1C3-01	183.794	715.817	899.611	0.740461
TCGA-DI-A2QT-01	-1371.47	-717.26	-2088.73	0.955812
TCGA-DI-A2QU-01	-1144.16	-808.319	-1952.48	0.949742
TCGA-DI-A2QY-01	-1224.97	-1192.7	-2417.67	0.968887
TCGA-E6-A1LX-01	-1743.44	-1072.21	-2815.65	0.981685
TCGA-E6-A1LZ-01	-1739.71	-185.447	-1925.16	0.948479
TCGA-E6-A2P9-01	-1618.8	-362.276	-1981.08	0.951048
TCGA-E6-A8L9-01	-249.891	-41.4002	-291.291	0.846069
TCGA-EC-A1NJ-01	-209.934	553.69	343.756	0.792776
TCGA-EC-A1QX-01	-508.638	466.698	-41.9393	0.825995
TCGA-EC-A24G-01	-233.856	11.8276	-222.029	0.840606
TCGA-EO-A1Y7-01	-1798.89	-565.788	-2364.68	0.966933
TCGA-EO-A1Y8-01	-1290.34	-901.014	-2191.35	0.960132
TCGA-EO-A22R-01	-972.666	-529.123	-1501.79	0.92697
TCGA-EO-A22S-01	-1618.4	-1342.03	-2960.43	0.985512
TCGA-EO-A22T-01	-588.496	-20.2181	-608.714	0.86998
TCGA-EO-A22U-01	-1444.99	-915.065	-2360.06	0.96676
TCGA-EO-A22X-01	-271.129	-109.235	-380.364	0.852966
TCGA-EO-A22Y-01	-972.553	-921.094	-1893.65	0.947003
TCGA-EO-A2CG-01	-476.999	-1029.62	-1506.62	0.927236
TCGA-EO-A2CH-01	-1786.96	-708.565	-2495.52	0.971653
TCGA-EO-A3AS-01	-728.19	-363.224	-1091.41	0.902705
TCGA-EO-A3AU-01	-790.309	28.8495	-761.459	0.880816
TCGA-EO-A3AY-01	-864.155	662.348	-201.808	0.838994
TCGA-EO-A3AZ-01	-97.4811	1803.53	1706.05	0.655905
TCGA-EO-A3B0-01	-440.325	-261.347	-701.672	0.876627
TCGA-EO-A3B1-01	-407.217	393.5	-13.7169	0.823653
TCGA-EO-A3KU-01	-1508.79	-781.379	-2290.17	0.964086
TCGA-EO-A3KW-01	-1156.16	134.588	-1021.57	0.898247
TCGA-EO-A3KX-01	-1611.98	-1206.6	-2818.58	0.981767
TCGA-EO-A3L0-01	-864.734	-934.237	-1798.97	0.942448
TCGA-EY-A1G7-01	-1471.69	-1186.87	-2658.56	0.977032
TCGA-EY-A1G8-01	-1701.87	-1245.86	-2947.73	0.985194
TCGA-EY-A1GC-01	-1089.22	972.199	-117.018	0.832157
TCGA-EY-A1GD-01	-1305.24	-704.099	-2009.34	0.952321
TCGA-EY-A1GE-01	-759.364	45.3084	-714.056	0.8775
TCGA-EY-A1GF-01	-1178.79	-611.62	-1790.41	0.942027
TCGA-EY-A1GH-01	-1236.53	-473.522	-1710.06	0.938004
TCGA-EY-A1GI-01	-878.444	-488.454	-1366.9	0.919361
TCGA-EY-A1GK-01	-794.684	225.407	-569.277	0.867111
TCGA-EY-A1GL-01	-813.695	-762.892	-1576.59	0.931033
TCGA-EY-A1GM-01	-1515.96	-1496.55	-3012.52	0.98678
TCGA-EY-A1GP-01	-393.387	-455.939	-849.326	0.886849
TCGA-EY-A1GQ-01	-470.941	-704.211	-1175.15	0.907926
TCGA-EY-A1GR-01	-691.154	212.607	-478.547	0.8604
TCGA-EY-A1GT-01	-577.391	-730.721	-1308.11	0.915932
TCGA-EY-A1GU-01	-1448.4	-335.362	-1783.77	0.941699
TCGA-EY-A1GW-01	-1392.54	-742.317	-2134.86	0.957781
TCGA-EY-A1GX-01	-1923.51	-1554.08	-3477.58	0.995536
TCGA-EY-A215-01	-1864.71	-354.9	-2219.61	0.961283
TCGA-EY-A2OM-01	-459.796	-613.093	-1072.89	0.901532
TCGA-EY-A2ON-01	-1110.21	-208.166	-1318.38	0.916536
TCGA-EY-A2OO-01	-1164.15	-1037.6	-2201.75	0.960557
TCGA-EY-A2OP-01	-1837.46	-916.224	-2753.68	0.979912
TCGA-EY-A2OQ-01	-892.619	-706.295	-1598.91	0.932224
TCGA-EY-A3L3-01	-1752.04	-1477.72	-3229.76	0.991445
TCGA-EY-A3QX-01	-1355.17	-318.561	-1673.73	0.936142
TCGA-EY-A547-01	-1838.79	-1070.25	-2909.04	0.984204
TCGA-EY-A548-01	-888.562	-152.978	-1041.54	0.899531
TCGA-EY-A549-01	-1480.3	-448.982	-1929.28	0.948671
TCGA-EY-A5W2-01	-987.593	-108.019	-1095.61	0.90297
TCGA-EY-A72D-01	-1159.58	-1138.6	-2298.19	0.964398
TCGA-FI-A2CX-01	317.677	3453.84	3771.52	0.40062
TCGA-FI-A2CY-01	-809.216	941.479	132.263	0.811313
TCGA-FI-A2D0-01	-974.294	-627.882	-1602.18	0.932397
TCGA-FI-A2D2-01	-728.096	-579.284	-1307.38	0.915889
TCGA-FI-A2D6-01	-1034.51	260.712	-773.794	0.881672
TCGA-FI-A2EU-01	-1997.16	-1385.19	-3382.34	0.99412
TCGA-FI-A2EW-01	-1466.87	-617.371	-2084.24	0.955618
TCGA-FI-A2EX-01	-1457.92	-553.805	-2011.73	0.952428
TCGA-FI-A2EY-01	-1558.21	-1039.75	-2597.96	0.975097
TCGA-FI-A2F4-01	-1117.6	440.67	-676.931	0.874874
TCGA-FI-A2F8-01	-735.535	-491.111	-1226.65	0.911068
TCGA-FI-A2F9-01	-700.988	-1693.29	-2394.28	0.968032
TCGA-FI-A3PV-01	-1583.41	-1364.77	-2948.18	0.985205
TCGA-KJ-A3U4-01	-1330.81	177.596	-1153.21	0.906571
TCGA-KP-A3VZ-01	-1841.66	-1487.59	-3329.25	0.993246
TCGA-KP-A3W0-01	-650.633	257.878	-392.754	0.853914
TCGA-KP-A3W1-01	-179.272	1443.1	1263.83	0.703488
TCGA-KP-A3W3-01	-617.664	162.079	-455.585	0.858678
TCGA-KP-A3W4-01	-221.802	-448.835	-670.637	0.874426
TCGA-PG-A5BC-01	-527.984	-1181.07	-1709.05	0.937953
TCGA-PG-A6IB-01	-534.46	1385.88	851.422	0.745197
TCGA-PG-A7D5-01	-1154.28	-1234.53	-2388.82	0.96783
TCGA-PG-A914-01	-1250.06	-158.331	-1408.39	0.92174
TCGA-PG-A915-01	-1559.55	-1137.54	-2697.09	0.978221
TCGA-PG-A916-01	-1175.92	-496.069	-1671.99	0.936052
TCGA-PG-A917-01	-904.875	476.356	-428.518	0.856634
TCGA-QF-A5YS-01	-1592.83	-272.029	-1864.86	0.945638
TCGA-QF-A5YT-01	-1138.77	-943.932	-2082.7	0.955552
TCGA-QS-A5YQ-01	-964.579	277.606	-686.973	0.875587
TCGA-QS-A5YR-01	-580.239	458.787	-121.452	0.832518
TCGA-QS-A744-01	-986.415	-1716.56	-2702.98	0.9784
TCGA-QS-A8F1-01	-789.201	-725.031	-1514.23	0.927654
TCGA-SJ-A6ZI-01	-763.585	830.985	67.3998	0.816842
TCGA-SJ-A6ZJ-01	-864.414	-569.791	-1434.2	0.923203
TCGA-A5-A0R6-01	-426.492	-522.566	-949.058	0.893518
TCGA-AJ-A2QL-01	-870.283	441.789	-428.495	0.856633
TCGA-AJ-A3NF-01	433.373	365.694	799.066	0.7503
TCGA-AJ-A3QS-01	-1090.92	299.363	-791.553	0.882899
TCGA-AP-A054-01	-1685.39	-1475.44	-3160.83	0.990074
TCGA-AP-A0L8-01	-1024.62	-1472.87	-2497.49	0.971721
TCGA-AP-A0LM-01	494.058	974.318	1468.38	0.681835
TCGA-AP-A1E0-01	-729.939	-743.504	-1473.44	0.925401
TCGA-AP-A1E3-01	82.2751	-723.904	-641.629	0.872352
TCGA-AX-A3G9-01	-1664.18	-1318.77	-2982.95	0.986067
TCGA-B5-A0JZ-01	-447.83	1145.62	697.794	0.760044
TCGA-B5-A1N2-01	-519.664	-533.441	-1053.1	0.900271
TCGA-B5-A5OE-01	-1563.94	-957.484	-2521.42	0.972544
TCGA-BS-A0UV-01	-1141.03	-620.49	-1761.52	0.940596
TCGA-D1-A15W-01	-859.765	-66.6293	-926.395	0.892019
TCGA-D1-A16S-01	-835.829	-884.679	-1720.51	0.938534
TCGA-D1-A2G5-01	-1726.46	-1137.42	-2863.88	0.983009
TCGA-D1-A3DA-01	-1272.24	-581.084	-1853.33	0.945085
TCGA-D1-A3JQ-01	-763.892	-462.083	-1225.97	0.911027
TCGA-DF-A2KR-01	-1706.13	-50.4516	-1756.58	0.940349
TCGA-DF-A2KY-01	-978.653	513.782	-464.871	0.859375
TCGA-EY-A1GO-01	-1695.23	-1384.02	-3079.25	0.98832
TCGA-EY-A1GV-01	-896.539	23.5694	-872.97	0.888447
TCGA-EY-A212-01	-1462.92	-983.706	-2446.63	0.969931
TCGA-EY-A214-01	-696.278	307.815	-388.463	0.853586
TCGA-FI-A2D4-01	-1090.1	-1071.22	-2161.32	0.95889
TCGA-FI-A2D5-01	-541.518	-463.707	-1005.22	0.89719
TCGA-K6-A3WQ-01	-1067.85	-954.505	-2022.35	0.952903
TCGA-AP-A05D-01	-541.788	789.598	247.81	0.801281
TCGA-AP-A0LI-01	-538.174	1290.29	752.113	0.754838
TCGA-AP-A1DR-01	-1485.79	-646.268	-2132.06	0.957663
TCGA-AX-A06F-01	-679.669	501.295	-178.374	0.837118
TCGA-AX-A0IU-01	-1312.96	-971.19	-2284.15	0.963851
TCGA-AX-A1C7-01	-1271.06	-863.051	-2134.11	0.957749
TCGA-B5-A0JY-01	-414.623	-308.432	-723.055	0.878133
TCGA-B5-A1MY-01	-374.334	-852.16	-1226.49	0.911058
TCGA-BK-A0CB-01	387.707	136.211	523.918	0.776381
TCGA-BK-A0CC-01	-1114.65	-894.461	-2009.12	0.952311
TCGA-D1-A163-01	-646.015	-254.939	-900.954	0.890325
TCGA-D1-A1NW-01	-1123.62	-346.131	-1469.76	0.925196
TCGA-D1-A2G6-01	-167.128	-437.833	-604.961	0.869708
TCGA-DI-A1NN-01	-697.052	565.609	-131.442	0.833329
TCGA-DI-A1NO-01	-1787.15	-1382.24	-3169.39	0.99025
TCGA-E6-A1M0-01	-998.919	-504.531	-1503.45	0.927062
TCGA-E6-A2P8-01	-338.477	497.868	159.391	0.808979
TCGA-JU-AAVI-01	-856.271	924.889	68.6181	0.816739
TCGA-B5-A3S1-01	-1029.69	-465.441	-1495.13	0.926603
TCGA-BS-A0T9-01	-573.392	47.1099	-526.282	0.86395
TCGA-BS-A0TA-01	-451.781	2298.75	1846.97	0.640152
TCGA-BS-A0U8-01	-936.528	-726.121	-1662.65	0.935569
TCGA-D1-A1O8-01	-168.414	1590.28	1421.87	0.686813
TCGA-A5-A0G3-01	-1299.71	-1215.64	-2515.35	0.972336
TCGA-AP-A5FX-01	-1241.79	-68.2723	-1310.06	0.916047
TCGA-AX-A2HD-01	-1414.12	-547.509	-1961.63	0.950161
TCGA-D1-A17U-01	-860.22	-320.187	-1180.41	0.908249
TCGA-EY-A1H0-01	-1974.62	-1150.42	-3125.04	0.989322
TCGA-AJ-A3BD-01	-1334.33	120.573	-1213.76	0.910286
TCGA-AX-A05S-01	-646.875	166.53	-480.346	0.860535
TCGA-AX-A2HK-01	-1178.7	-1160.97	-2339.67	0.96599
TCGA-DF-A2L0-01	-719.085	372.373	-346.712	0.850378
TCGA-EY-A54A-01	-564.503	210.126	-354.378	0.850969
TCGA-A5-A0GA-01	-943.917	-381.953	-1325.87	0.916975
TCGA-AP-A1DQ-01	-971.31	-639.772	-1611.08	0.932869
TCGA-B5-A11X-01	-58.6844	613.084	554.399	0.773554
TCGA-EO-A3AV-01	-689.373	1272.92	583.55	0.770835
TCGA-FI-A3PX-01	-1569.19	-1201.46	-2770.65	0.980405
TCGA-A5-A1OG-01	-1442.95	-49.8512	-1492.8	0.926475
TCGA-AX-A3GI-01	-1883.18	-1325.65	-3208.83	0.99104
TCGA-EY-A1GS-01	-1706.95	-259.514	-1966.46	0.950382
TCGA-EY-A4KR-01	-486.303	768.79	282.487	0.798225
TCGA-AJ-A3BF-01	-1188.23	-917.999	-2106.23	0.956564
TCGA-BG-A0M6-01	-1041.87	-1789.73	-2831.6	0.982128
TCGA-D1-A179-01	-1420.23	-1159.38	-2579.61	0.974496
TCGA-EO-A1Y5-01	-749.582	547.792	-201.79	0.838993
TCGA-AJ-A3EJ-01	-115.89	-32.3795	-148.27	0.834692
TCGA-AX-A2H7-01	-1368.11	-873.362	-2241.48	0.962163
TCGA-EY-A210-01	-1075.34	722.936	-352.4	0.850817
TCGA-AP-A0LF-01	-1205.27	1689.69	484.417	0.780023
TCGA-AP-A3K1-01	-916.262	-721.249	-1637.51	0.934259
TCGA-D1-A1NX-01	-1211.7	-765.479	-1977.17	0.95087
TCGA-D1-A16V-01	-1017.48	123.999	-893.477	0.889825
TCGA-BK-A0CA-01	-1311.35	-479.704	-1791.05	0.942059
