# Supplementary material for: A stemness-based signature with inspiring indications in discriminating the prognosis, immune response, and somatic mutation of endometrial cancer patients revealed by machine learning
Source: Aging (Albany NY). 2024 Jul 30;16(14):11248–74. doi: 10.18632/aging.205979 (PMC11315399; doi:10.18632/aging.205979)
Supplement: Supplementary File 4 [file aging-16-205979-s006.xlsx]

## Sheet: 4-lassoRisk
Supplementary File 4. LASSO risk and score for TCGA patients.
id	futime	fustat	ART3	C1orf64	FOXD3	FRMPD2	FRMPD2L1	IHH	LMO1	SERPIND1	TMEM114	riskScore	risk
TCGA-2E-A9G8-01	3.42192	0	0.6	0.6	0.6	4.5663	2.0337	5.7988	2.2048	2.3578	0	0.894698	high
TCGA-4E-A92E-01	0.0356164	0	5.3918	6.5319	0	4.728	0	10.7154	1.4965	7.3416	3.7328	0.45748	low
TCGA-5B-A90C-01	3.29315	0	4.3874	0.9627	0	0.9627	0	2.7429	1.3683	0.3965	0	0.88677	high
TCGA-5S-A9Q8-01	0.857534	0	6.4151	9.5667	1.4442	3.2639	0	11.4643	0	6.6558	0	0.488121	low
TCGA-A5-A0G1-01	8.90685	1	0.9016	0	0.9016	3.1396	0	3.9779	4.1287	1.4521	3.1396	0.962438	high
TCGA-A5-A0G2-01	12.463	0	0	1.3723	0	3.7773	3.2837	0.8435	1.3723	1.3723	0	0.821709	high
TCGA-A5-A0G3-01	3.91233	0	0	0	0	0	0	2.7472	5.9307	1.2801	0	1.08119	high
TCGA-A5-A0G5-01	3.08493	0	0	1.218	1.8689	0	0	1.218	8.4504	2.6565	0	1.21308	high
TCGA-A5-A0G9-01	6.9589	0	2.7033	9.5113	2.4357	5.2953	1.8175	11.0325	3.7146	5.8932	3.4493	0.515137	low
TCGA-A5-A0GA-01	1.48767	1	0.8255	0	0	5.1598	0	0.8255	4.9233	0	0	1.03704	high
TCGA-A5-A0GB-01	2.73151	0	0	7.2923	0	2.8889	0.6154	7.497	0	0.8246	0.8246	0.599367	low
TCGA-A5-A0GD-01	9.37808	1	3.1896	5.4876	0	7.2177	6.1957	9.7598	0.8578	4.7974	3.5311	0.44387	low
TCGA-A5-A0GE-01	8.78082	0	5.7544	6.5356	0	8.1443	7.4596	12.1733	0	6.1879	3.8324	0.362281	low
TCGA-A5-A0GG-01	10.3068	0	3.217	3.3404	0	7.3691	6.1773	8.7922	0	6.0202	2.58	0.494482	low
TCGA-A5-A0GH-01	6.17534	0	0	0	2.0469	3.5548	0.2767	8.9698	2.6963	2.5106	0	1.10608	high
TCGA-A5-A0GI-01	7.34795	0	1.0392	9.4149	0	5.7764	5.1627	11.6534	1.6371	4.8821	4.8295	0.370294	low
TCGA-A5-A0GJ-01	5.47945	0	1.533	10.5535	0	5.8054	0	12.8449	2.7402	1.533	4.0136	0.443036	low
TCGA-A5-A0GM-01	5.04384	0	1.7984	8.5985	0	5.5113	5.5113	10.7217	0	5.2069	5.3006	0.360849	low
TCGA-A5-A0GN-01	5.04384	0	5.8239	8.1505	0	2.9158	0	12.5038	2.0954	3.199	0	0.530138	low
TCGA-A5-A0GP-01	3.87945	0	2.1409	6.04	0	3.4895	1.8241	5.1336	2.8008	0	2.8008	0.607641	low
TCGA-A5-A0GQ-01	6.15616	0	6.2375	4.6122	0	7.536	7.1981	9.3881	1.0143	2.0213	2.0213	0.486495	low
TCGA-A5-A0GR-01	3.06849	0	0	3.3382	0	4.0169	0	6.5953	1.3328	0	3.5401	0.714797	high
TCGA-A5-A0GU-01	2.35616	0	5.2796	8.9143	0	4.6982	3.7952	10.8334	0	6.4978	4.4011	0.353879	low
TCGA-A5-A0GV-01	4.50137	0	5.1886	4.8372	0	3.6806	2.5671	4.8861	0	2.5671	0.9893	0.5776	low
TCGA-A5-A0GW-01	1.93425	0	2.5693	2.3541	0	2.101	0	4.1252	2.3541	2.3541	2.7566	0.739133	high
TCGA-A5-A0GX-01	5.72055	0	2.7437	9.261	0	6.4102	5.4029	11.8163	2.7437	6.6336	4.1774	0.361136	low
TCGA-A5-A0R6-01	3.1589	0	2.8789	2.8789	0	5.6049	5.1251	6.6822	1.6409	2.0628	0	0.660148	high
TCGA-A5-A0R7-01	1.46575	0	4.6522	5.8665	0	1.0043	0	11.518	2.5922	1.5908	5.2564	0.545086	low
TCGA-A5-A0R8-01	1.63288	0	1.0641	1.6698	0	7.783	6.8234	8.8564	0	0	4.2058	0.594204	low
TCGA-A5-A0R9-01	2.05205	0	5.8469	7.3882	0	5.7934	5.2744	11.7684	1.0337	3.7621	5.6199	0.377567	low
TCGA-A5-A0RA-01	2.42192	0	4.4415	2.7913	0	7.4571	6.7093	10.0352	0	4.2301	2.7913	0.507349	low
TCGA-A5-A0VO-01	2.39726	1	3.3493	8.2186	0	6.4646	6.0699	9.6283	0	3.8862	5.1296	0.36593	low
TCGA-A5-A0VP-01	3.52877	0	2.2163	6.6754	0	4.7296	0	2.4748	0.9349	1.4975	2.6939	0.573167	low
TCGA-A5-A0VQ-01	1.32877	0	5.7652	6.3229	0	3.9424	2.6167	10.7131	3.8427	2.6167	3.494	0.509341	low
TCGA-A5-A1OF-01	2.66575	0	0	0	1.3294	4.5664	0	2.0092	0	1.3294	2.4695	0.952287	high
TCGA-A5-A1OG-01	2.66575	1	0.9816	0.9816	0.9816	3.674	4.0936	0.9816	6.1533	1.9723	1.5604	0.904455	high
TCGA-A5-A1OH-01	3.0274	0	2.1175	1.847	6.0101	0	1.6899	2.9409	3.6007	2.5419	0	1.3984	high
TCGA-A5-A1OJ-01	2.75616	0	3.8791	4.2695	0	7.2681	6.2986	6.3193	0	2.478	1.7162	0.522212	low
TCGA-A5-A1OK-01	2.51233	0	4.5104	4.7883	1.7745	8.0841	6.4575	11.2791	0	2.5466	2.3321	0.554999	low
TCGA-A5-A2K2-01	9.84932	0	1.8184	0	3.8217	1.5953	0	1.0077	2.0116	0.5901	0	1.35493	high
TCGA-A5-A2K3-01	5.51233	0	1.511	1.511	2.7116	0.9449	0	3.3577	5.4137	3.0705	3.3577	1.02541	high
TCGA-A5-A2K4-01	2.3863	1	0	0	3.0021	0	0	1.8863	2.0828	0.6224	0	1.31516	high
TCGA-A5-A2K5-01	2.06027	0	0	7.9571	1.0805	2.2933	0	6.4587	0	3.8458	1.0805	0.600836	low
TCGA-A5-A2K7-01	2.91233	0	1.737	0	0.9511	2.3786	0	2.2429	3.9512	0	0	1.10819	high
TCGA-A5-A3LO-01	2.12603	0	0	2.8123	0.9644	1.3703	0	1.3703	0.3974	0.7085	0	0.907567	high
TCGA-A5-A3LP-01	1.24658	0	0.5233	0.5233	0	1.4589	0	0	8.8554	2.5385	2.0217	0.997829	high
TCGA-A5-A7WJ-01	0.934247	0	5.4167	2.9292	1.4468	4.4405	1.5916	7.988	2.9827	2.1545	1.1048	0.774885	high
TCGA-A5-A7WK-01	1.53425	0	1.1727	1.3606	3.8249	0.3935	0	0.7024	4.8691	0.9567	0.7024	1.31606	high
TCGA-A5-AB3J-01	1.40274	0	7.4576	9.9798	1.6233	1.4139	0	12.2249	2.2465	8.7733	2.937	0.435222	low
TCGA-AJ-A23M-01	1.68767	1	0	1.8679	4.9558	2.1806	0	1.8679	8.3294	1.4682	0	1.5244	high
TCGA-AJ-A23N-01	1.20274	1	0.4374	0.7727	0	1.0445	0	1.644	2.1834	0.4374	0	0.969755	high
TCGA-AJ-A23O-01	0.854795	1	6.1853	6.046	0	5.1082	4.11	6.3802	2.2714	1.543	0.9686	0.53896	low
TCGA-AJ-A2QK-01	1.76164	0	4.3055	9.5229	0	5.218	4.3992	12.2113	4.0017	1.8086	2.5865	0.433741	low
TCGA-AJ-A2QL-01	1.64932	0	3.8538	8.6534	0	8.6234	7.3895	11.8989	0	4.1345	2.0376	0.369555	low
TCGA-AJ-A2QM-01	2.44932	0	4.2789	0.5352	0	0	0	0	5.9349	0.5352	0	1.00915	high
TCGA-AJ-A2QN-01	2.92877	0	6.2677	8.4389	0	7.1466	5.5432	9.7403	0	4.4114	2.8753	0.371687	low
TCGA-AJ-A2QO-01	2.86301	1	0	7.3668	1.3451	5.7791	0	7.5879	1.7271	1.1079	4.1961	0.606067	low
TCGA-AJ-A3BD-01	2.84658	0	0	2.2587	0	0	0	5.5564	4.8461	1.1775	2.4374	0.853836	high
TCGA-AJ-A3BF-01	1.50959	0	0	0	6.5963	1.3242	0	4.396	5.1936	0.5862	0.5862	1.82048	high
TCGA-AJ-A3BG-01	1.50685	0	1.0317	2.7538	0	4.552	0	0	4.9677	1.6272	0	0.865102	high
TCGA-AJ-A3BI-01	1.57534	0	3.9741	5.2276	0	0	0	6.501	3.4901	2.07	4.3808	0.607506	low
TCGA-AJ-A3BK-01	2.82466	0	1.3738	9.5951	0	3.4699	0	10.9333	1.8689	2.8809	5.2531	0.439366	low
TCGA-AJ-A3EJ-01	0.136986	1	0	0	0	2.7409	0	1.942	2.1411	1.0956	1.942	0.923283	high
TCGA-AJ-A3EK-01	1.22192	1	1.18	5.4184	0	1.18	0	6.7682	2.6	1.4263	1.6366	0.680154	high
TCGA-AJ-A3EL-01	1.87397	0	1.6641	1.2026	1.2026	1.8492	0	7.5906	0	2.0132	2.5291	0.848523	high
TCGA-AJ-A3EM-01	1.85479	0	1.3363	1.3363	2.6639	0	0	1.8753	5.8999	2.7482	0	1.19592	high
TCGA-AJ-A3I9-01	1.42192	1	3.7378	6.222	0	5.4979	0	7.2543	3.2866	1.1338	0.4835	0.638845	low
TCGA-AJ-A3IA-01	1.73425	0	3.7036	0	7.5303	0	0	2.9126	5.5349	2.4509	0	1.8636	high
TCGA-AJ-A3NC-01	3.08219	0	5.42	5.1607	1.2144	4.524	2.0289	8.5596	1.465	5.0308	1.465	0.596296	low
TCGA-AJ-A3NE-01	1.72055	0	3.6893	4.2078	1.3147	1.991	0	8.4289	3.0768	0	1.5157	0.807251	high
TCGA-AJ-A3NF-01	1.76712	0	1.6122	0	0.4252	0	0	0.7533	1.9041	3.3585	0.7533	0.946045	high
TCGA-AJ-A3NG-01	1.30137	0	4.4277	2.4565	0	4.6092	0.4012	3.7893	1.834	0.4012	0.7148	0.768609	high
TCGA-AJ-A3NH-01	0.849315	1	1.5796	0	2.7156	3.0286	0	2.0643	4.3286	0.4832	1.5796	1.21097	high
TCGA-AJ-A3OJ-01	1.27945	0	3.2578	0.5886	1.3285	2.7098	0.5886	7.2155	1.3285	0	1.3285	0.948454	high
TCGA-AJ-A3OK-01	1.32877	0	2.0835	10.0068	0	6.4236	4.9138	11.1355	2.6279	4.1569	4.1569	0.375057	low
TCGA-AJ-A3OL-01	1.23014	1	0.4801	0.4801	4.6711	3.6379	1.7522	5.2963	3.3334	0.8396	0.4801	1.34648	high
TCGA-AJ-A3QS-01	1.40548	0	2.7205	1.7639	0	0.4848	0	6.272	0	0.4848	1.1363	0.807126	high
TCGA-AJ-A3TW-01	1.40548	0	0.8951	0.5159	0	0	0	0	3.5544	1.8398	0	0.986503	high
TCGA-AJ-A5DV-01	1.86027	0	7.5302	5.2495	0	6.9684	4.2869	10.7189	0	2.6827	2.206	0.47546	low
TCGA-AJ-A5DW-01	1.06849	0	0.8742	7.3415	0	2.115	0	9.6024	0	1.9692	2.2474	0.555472	low
TCGA-AJ-A6NU-01	1.73151	0	4.2925	3.3643	3.9172	4.8999	0	8.3335	3.4085	0.4012	0.4012	1.05509	high
TCGA-AJ-A8CT-01	0.224658	0	5.0853	9.2383	0	8.6167	1.9052	11.6238	4.3764	2.2762	1.6765	0.463613	low
TCGA-AJ-A8CV-01	2.92603	0	7.168	3.7152	0	7.6015	4.4286	10.4794	0	3.1593	0.9511	0.532769	low
TCGA-AP-A051-01	10.8164	0	2.0846	10.4559	2.0846	5.5604	0	7.7586	1.39	1.7787	1.39	0.569416	low
TCGA-AP-A052-01	1.83288	1	0	0	3.704	0	1.2246	6.2454	4.3013	0	0	1.4121	high
TCGA-AP-A054-01	1.94247	1	2.5927	0.7815	7.1561	2.1931	0.0308	3.2671	6.7849	2.5927	0.7815	1.71393	high
TCGA-AP-A056-01	7.1726	0	0.9936	1.9903	0.9936	4.5112	1.9903	6.4302	0.9936	1.9903	3.1584	0.752065	high
TCGA-AP-A059-01	4.00274	0	3.488	1.7478	0	0.8369	0	5.5901	0.8369	2.0513	2.3018	0.752206	high
TCGA-AP-A05A-01	5.32603	1	4.3767	0	0	0	0	7.0013	8.9768	0	1.9354	1.01784	high
TCGA-AP-A05D-01	4.81644	0	1.1266	1.1266	0	1.7514	0	1.7514	7.6253	1.1266	0	1.02436	high
TCGA-AP-A05H-01	3.79452	1	0	0	0	1.4598	0	1.4598	6.8863	0	0	1.12452	high
TCGA-AP-A05J-01	3.07397	0	0	1.2789	0	2.7455	0	3.6337	7.953	1.946	2.4004	0.92631	high
TCGA-AP-A05N-01	1.98904	1	4.0156	5.5862	0	1.332	0	11.216	2.8217	1.332	1.332	0.645262	low
TCGA-AP-A05O-01	1.05205	0	5.0087	9.4489	0.9194	5.2304	4.4848	12.1542	0	4.3651	1.4764	0.421442	low
TCGA-AP-A05P-01	1.74247	0	3.2322	5.1122	0	5.2047	3.724	10.846	0.8184	2.0191	3.805	0.514297	low
TCGA-AP-A0L8-01	4.06575	1	1.4318	0	5.9766	0.8867	0	0	2.1361	0.8867	0	1.64404	high
TCGA-AP-A0L9-01	10.4521	0	0.8817	0	0	5.6153	4.7611	6.2792	6.3554	1.8186	0	0.888006	high
TCGA-AP-A0LD-01	9.83288	0	4.3733	1.8371	0	4.0972	4.0569	1.8371	10.0146	0	0	0.891823	high
TCGA-AP-A0LE-01	9.19726	0	3.5518	5.5694	1.1322	1.7586	0	11.9114	1.1322	2.194	1.1322	0.679732	high
TCGA-AP-A0LF-01	7.83288	0	1.6819	2.4375	0	2.9309	0	3.5901	6.0716	1.6819	0	0.890792	high
TCGA-AP-A0LG-01	5.52055	0	5.393	3.5981	0	4.1773	0	9.8912	2.6153	3.5981	0.8911	0.663441	high
TCGA-AP-A0LH-01	3.03014	1	4.1993	2.2394	0	3.4496	2.8487	9.737	1.1639	0	0	0.741602	high
TCGA-AP-A0LI-01	8.14247	0	2.4378	4.7819	5.1837	1.9802	0	1.9802	7.0612	0	0	1.2883	high
TCGA-AP-A0LJ-01	3.89315	0	6.6376	7.6409	0	8.7868	8.148	13.5662	0	4.0828	4.3106	0.337504	low
TCGA-AP-A0LL-01	6.99726	0	4.499	9.4193	0	0	0	12.3722	2.3014	8.9602	4.499	0.391437	low
TCGA-AP-A0LM-01	2.26027	0	1.1084	2.4917	0	1.1084	0	4.9569	0	5.9605	1.7277	0.688518	high
TCGA-AP-A0LN-01	6.87671	0	4.5477	7.1118	0	7.3548	6.6794	13.8508	2.4535	8.2828	3.3155	0.372002	low
TCGA-AP-A0LO-01	2.78356	1	3.1502	5.7818	4.3314	4.6493	2.3335	11.3156	1.7008	2.4598	0	0.853699	high
TCGA-AP-A0LP-01	5.13699	0	0	9.0994	0	8.2627	7.7257	9.9118	0	6.0386	4.2138	0.340818	low
TCGA-AP-A0LS-01	7.95616	0	2.2115	6.4168	0	4.7724	3.0467	6.1105	3.6784	1.8968	3.0467	0.549568	low
TCGA-AP-A0LT-01	4.10137	0	6.907	5.8991	2.1063	5.1913	3.2117	5.3459	2.3596	0.869	0.869	0.671844	high
TCGA-AP-A0LV-01	2.09041	0	5.0115	3.3495	0	5.274	4.4689	11.8822	3.0626	3.0626	4.6382	0.534275	low
TCGA-AP-A1DH-01	5.9726	0	1.1474	6.1837	0	3.8519	4.5858	1.7783	3.9617	1.7783	1.7783	0.586811	low
TCGA-AP-A1DK-01	7.58082	0	0	4.8807	0	2.9763	0	3.6754	6.7146	3.9746	1.5669	0.728524	high
TCGA-AP-A1DM-01	4.65753	0	2.9066	5.1436	0	5.1053	4.1466	9.8644	2.4962	1.5144	3.487	0.541844	low
TCGA-AP-A1DO-01	2.60822	0	1.8597	0	3.1518	3.7584	0.6902	9.5531	2.4282	0.908	0	1.19971	high
TCGA-AP-A1DP-01	2.96164	1	4.9245	5.8239	0	8.0089	7.6467	9.2269	0	3.8983	2.495	0.423355	low
TCGA-AP-A1DQ-01	3.89863	1	1.4115	1.4115	0	3.8385	4.3267	7.1759	0	5.096	0	0.684434	high
TCGA-AP-A1DR-01	4.09589	0	2.9879	2.6323	0	0	0	6.7953	5.6303	0	0	0.901998	high
TCGA-AP-A1DV-01	0.558904	0	0	8.0397	0	5.3798	4.1484	8.7229	4.7278	1.7615	1.375	0.541238	low
TCGA-AP-A1E0-01	5.01918	0	1.7737	7.2151	0	5.1892	0	11.3237	2.0792	1.7737	3.8787	0.52814	low
TCGA-AP-A1E1-01	3.82192	0	5.6514	8.1961	3.0685	4.8941	3.735	11.6307	0	3.3264	0.8647	0.573409	low
TCGA-AP-A1E3-01	2.32055	0	3.4823	5.6447	0	3.4823	2.7116	9.7191	0	1.9166	2.4919	0.536625	low
TCGA-AP-A1E4-01	4.26027	0	1.6245	1.0298	0	1.6245	0	0	2.6342	1.6245	1.6245	0.872768	high
TCGA-AP-A3K1-01	1.82466	1	3.0042	1.39	0.6231	0	0	3.2696	0.6231	1.39	2.7955	0.821872	high
TCGA-AP-A5FX-01	3.01096	1	4.3933	2.154	1.9109	6.928	3.0534	7.5442	3.8878	0.7571	0	0.880761	high
TCGA-AW-A1PO-01	0.0465753	0	2.6954	0	0	4.4158	0	0	7.5666	2.2964	0	1.01729	high
TCGA-AX-A05S-01	1.13151	1	4.1397	4.7617	0	3.9309	0	7.7783	1.755	3.3925	2.5237	0.598329	low
TCGA-AX-A05T-01	2.76712	0	3.1665	4.4775	0	5.8379	5.0254	7.81	0	7.303	0	0.51671	low
TCGA-AX-A05U-01	2.47397	0	5.6131	7.5399	0	6.6148	5.0099	13.5238	0	3.846	4.3972	0.380853	low
TCGA-AX-A05W-01	6.71233	0	3.6717	6.1772	0	4.987	0	11.1725	0	2.2058	3.1906	0.529716	low
TCGA-AX-A05Y-01	7.35342	0	1.4234	8.3017	1.8168	4.9671	3.6752	12.6245	1.4234	2.1257	4.0857	0.516302	low
TCGA-AX-A05Z-01	5.9589	0	2.2254	10.4263	0	3.0623	0	9.6571	3.2598	0	3.7285	0.482528	low
TCGA-AX-A060-01	2.94521	0	5.7644	7.0604	4.5285	4.7907	2.7048	8.946	1.9107	0	0.9411	0.796813	high
TCGA-AX-A062-01	3.83288	0	4.0078	4.8588	0	0	2.4088	8.1573	4.0078	2.9002	4.8588	0.565817	low
TCGA-AX-A063-01	6.62192	0	0	10.4862	0	5.1806	4.5651	12.1819	0	1.8152	3.0972	0.397927	low
TCGA-AX-A064-01	4.15616	0	4.4298	2.7236	0	2.8146	2.1067	9.9504	0	2.7236	1.5202	0.642788	low
TCGA-AX-A06B-01	5.63836	0	4.0479	7.3726	0.8294	2.9987	2.5013	7.4516	0	4.1141	1.3528	0.522875	low
TCGA-AX-A06F-01	4.78904	0	0	4.9288	1.3987	2.6485	3.3868	5.0761	0	2.5632	1.3987	0.68256	high
TCGA-AX-A06H-01	2.28219	0	3.4562	7.3401	0	3.7439	4.3185	10.8201	2.3992	2.3992	5.4975	0.436865	low
TCGA-AX-A06J-01	2.50137	0	2.1254	6.1624	0	9.52	8.5282	7.539	2.1254	0	0	0.522502	low
TCGA-AX-A06L-01	5.05479	0	4.1094	4.8126	0	6.9098	6.4549	10.5374	3.5657	5.9218	6.5414	0.418234	low
TCGA-AX-A0IS-01	5.09041	1	5.907	9.0636	1.0124	2.6056	1.0124	12.8685	1.0124	6.0467	4.8312	0.416654	low
TCGA-AX-A0IU-01	2.97808	0	1.0183	1.0183	0	1.585	1.0544	2.3512	2.8387	0	2.8387	0.850827	high
TCGA-AX-A0IW-01	3.14795	0	0	0	1.7407	2.5069	2.1741	1.7407	8.7349	0	1.1184	1.21886	high
TCGA-AX-A0IZ-01	3.65205	0	4.868	0	0	1.0598	0	7.225	1.0598	1.6642	1.0598	0.850236	high
TCGA-AX-A0J0-01	3.34247	0	0	4.7399	0	3.1366	0	3.4767	2.0418	4.5125	2.6906	0.636302	low
TCGA-AX-A0J1-01	6.44932	0	2.7432	4.8816	1.7828	4.8412	4.3595	9.5977	0	1.3936	1.7828	0.647256	low
TCGA-AX-A1C4-01	1.10685	0	4.2492	0.7375	0	4.6061	0	4.8257	2.5036	0.7375	0.7375	0.856269	high
TCGA-AX-A1C7-01	2.88767	0	1.2894	3.1609	0	0	1.6629	3.4738	4.3057	0	0	0.850601	high
TCGA-AX-A1C9-01	2.19726	0	5.1538	0	0	5.6864	4.4187	7.7785	2.9544	4.2902	0	0.73784	high
TCGA-AX-A1CA-01	2.66849	0	1.8283	1.1862	6.2768	0	1.1862	6.651	3.3116	1.1862	2.6094	1.39531	high
TCGA-AX-A1CC-01	2.1589	0	2.4202	0	2.0923	0	0	1.0622	2.9124	4.4379	0	1.09782	high
TCGA-AX-A1CE-01	2.8411	0	1.3995	7.1814	0	6.7697	6.1751	5.0773	3.2001	0.8632	0	0.548279	low
TCGA-AX-A1CF-01	6.40274	0	0	2.3389	8.2432	3.8877	0	0.8575	2.7405	0.8575	0.8575	1.71074	high
TCGA-AX-A1CI-01	7.12329	0	5.879	11.6064	2.3596	2.9795	0	13.4638	2.3596	7.7073	2.3596	0.44659	low
TCGA-AX-A1CJ-01	6.11781	0	4.5318	10.764	0	6.6979	0.037	12.6174	0	3.8092	5.0681	0.360319	low
TCGA-AX-A1CK-01	6.68767	0	1.1524	10.1165	1.1524	4.3622	3.0596	9.5776	1.1524	1.1524	3.257	0.478983	low
TCGA-AX-A1CN-01	3.13151	0	4.556	0	4.0014	2.388	0.3452	5.1813	4.0014	4.0014	0	1.23284	high
TCGA-AX-A2H2-01	0.39726	1	1.0117	0	6.4324	4.6662	0.1128	0	3.829	1.6005	0	1.68853	high
TCGA-AX-A2H4-01	2.50959	1	0	0	1.2789	0	3.2569	3.3607	2.5833	0.7768	0	1.04958	high
TCGA-AX-A2H5-01	5.93699	0	0	0.8804	2.7837	2.7837	0	2.9499	10.0833	1.8166	0	1.36304	high
TCGA-AX-A2H7-01	3.4	1	2.5568	7.2285	0	4.2716	3.9683	7.5718	2.2213	2.2213	1.7832	0.514573	low
TCGA-AX-A2HA-01	6.78082	0	7.3275	8.3986	2.0461	3.757	0	12.7884	2.5096	0	2.5096	0.598541	low
TCGA-AX-A2HC-01	2.86027	0	0	4.1839	0	0	0	2.0637	0	0.7103	0	0.777355	high
TCGA-AX-A2HD-01	3.87397	0	2.2288	2.2288	0	5.7575	4.4846	8.6701	4.8954	1.6837	0	0.748541	high
TCGA-AX-A2HG-01	3.1863	0	1.673	0	0	4.5165	2.9196	2.9196	7.0949	2.9196	0	0.928561	high
TCGA-AX-A2HH-01	1.47945	0	1.4754	0.4395	0	0.7759	0	1.0485	2.493	0	0	0.991798	high
TCGA-AX-A2HJ-01	2.56164	0	3.3374	8.7693	0	4.9984	2.3029	12.3515	0	3.6825	2.6925	0.427585	low
TCGA-AX-A2HK-01	0.246575	1	0	1.755	0	0.8414	0	6.5244	0.8414	3.0225	1.3693	0.79913	high
TCGA-AX-A2IN-01	2.59452	1	3.3573	0	5.4931	2.7496	0	2.3114	9.2424	2.434	0	1.66055	high
TCGA-AX-A2IO-01	5.41096	0	2.1792	2.7828	0	2.1792	0	7.255	7.0268	3.5344	1.7453	0.793526	high
TCGA-AX-A3FW-01	0.0465753	0	1.1234	6.6007	1.1234	4.3947	2.5146	11.3277	2.9034	0	2.9034	0.627358	low
TCGA-AX-A3FX-01	3.65205	1	2.1133	8.2082	0	3.6896	4.3482	9.8483	8.8437	1.2208	2.8049	0.545332	low
TCGA-AX-A3G1-01	1.70959	1	7.0388	5.0456	0	3.5455	0	7.7127	2.1886	1.9875	0.6718	0.627166	low
TCGA-AX-A3G8-01	0.0986301	0	1.224	1.224	0	1.3692	0.5067	0	5.9336	0	0	1.00608	high
TCGA-AX-A3G9-01	1.52877	0	4.3622	0.541	0.541	2.3491	0	5.3102	4.1194	0.541	0	0.979042	high
TCGA-AX-A3GB-01	1.20548	0	5.0109	9.2247	0	6.016	2.4028	12.6693	0.6894	7.6838	2.4028	0.375706	low
TCGA-AX-A3GI-01	0.0328767	0	0.5853	1.3224	7.2488	0.5853	0	0.5853	5.8464	0.5853	0	1.86909	high
TCGA-B5-A0JN-01	6.69863	0	0.7652	0.7652	0	1.0352	0	2.7217	1.6317	1.2625	2.1693	0.866771	high
TCGA-B5-A0JR-01	4.74247	0	5.0995	4.2532	0	1.2789	0	6.6898	0	0.9642	0	0.692787	high
TCGA-B5-A0JS-01	7.19726	0	7.3258	11.2078	0	6.8584	5.8708	12.991	0	1.5937	3.5969	0.321102	low
TCGA-B5-A0JT-01	4.60822	0	4.4232	4.4733	0	7.5321	6.128	10.3933	0	1.7105	2.656	0.498342	low
TCGA-B5-A0JU-01	4.93699	0	4.0062	7.5951	0.9156	4.8319	4.2939	12.1701	0.9156	1.8716	1.8716	0.507053	low
TCGA-B5-A0JV-01	7.16712	0	2.8861	7.4991	1.499	5.2498	3.7295	12.2351	0.936	0.936	4.3986	0.515475	low
TCGA-B5-A0JX-01	4.89589	0	4.7442	5.2279	0	6.8661	5.3897	7.9919	1.4748	3.021	3.7501	0.473156	low
TCGA-B5-A0JY-01	5.7726	0	0	3.5565	5.2917	0	0	5.1793	4.1406	1.5643	0	1.3241	high
TCGA-B5-A0JZ-01	5.95342	0	0.9443	7.6216	0	5.6698	4.7981	12.6763	1.5102	3.22	1.9156	0.471239	low
TCGA-B5-A0K0-01	4.04932	0	3.9341	3.3956	0.8429	0.8429	0	10.8871	2.5265	4.0071	3.6898	0.678811	high
TCGA-B5-A0K1-01	3.0411	0	5.6787	2.4241	0	7.4746	5.8119	9.4072	1.6706	3.9253	4.2898	0.51421	low
TCGA-B5-A0K2-01	6.05205	0	2.3097	5.4769	0	5.7291	4.8792	8.5634	0	2.9253	3.6863	0.48268	low
TCGA-B5-A0K3-01	2.27397	1	0	0	4.3895	6.2282	4.9784	5.5114	6.3577	1.1204	1.1204	1.26457	high
TCGA-B5-A0K4-01	4.8137	0	3.724	1.3373	0	2.0191	0	6.6026	0	0	0	0.842955	high
TCGA-B5-A0K6-01	5.35068	0	3.4009	10.37	0	5.2947	4.6775	13.4273	1.2425	3.7328	5.5261	0.340307	low
TCGA-B5-A0K7-01	5.29589	0	5.0999	9.1104	0	2.7458	3.0092	13.2321	2.796	6.3125	1.7562	0.419543	low
TCGA-B5-A0K8-01	2.32055	0	0.9393	1.908	0	3.8841	2.4824	3.9711	0	0	0.9393	0.770777	high
TCGA-B5-A0K9-01	1.12055	1	1.0749	4.3867	3.0015	5.1113	1.5081	6.9219	0.453	0	0	0.905085	high
TCGA-B5-A11E-01	4.9863	0	1.9369	4.5038	2.2545	4.0899	0	4.8722	4.0899	1.9369	0.9582	0.874499	high
TCGA-B5-A11F-01	15.4822	0	2.9128	6.3875	0	5.4769	4.0213	12.3492	0	3.1075	5.6743	0.42762	low
TCGA-B5-A11G-01	9.44658	0	3.1041	11.7578	0	8.0687	7.6224	12.2876	1.3333	4.7461	4.9009	0.28877	low
TCGA-B5-A11H-01	7.36164	0	0.8986	11.7533	0	5.5487	0	8.5748	3.2695	5.1873	3.8037	0.399599	low
TCGA-B5-A11I-01	6.30959	0	0	1.4613	0.9083	1.4613	0	1.8601	4.5727	1.4613	0	1.03525	high
TCGA-B5-A11J-01	4.53699	0	3.0533	7.5761	0.8569	5.1974	4.1063	9.4864	0.8569	1.7797	3.6272	0.488185	low
TCGA-B5-A11L-01	6.13699	1	3.7131	4.1309	0	4.8913	1.0408	6.5807	1.6792	1.0713	3.4478	0.616386	low
TCGA-B5-A11M-01	3.73151	0	5.7008	7.9219	0	7.1425	5.8599	12.7893	0	4.4412	3.9399	0.364797	low
TCGA-B5-A11N-01	5.13973	0	4.5338	10.907	2.2961	2.6358	0	7.7025	2.6358	0	3.3401	0.557081	low
TCGA-B5-A11O-01	7.14795	0	4.2662	4.3855	0	6.8404	5.4458	8.0838	0	1.8022	5.0591	0.475677	low
TCGA-B5-A11P-01	4.33699	0	4.8779	5.0932	0	5.9937	4.1349	5.664	4.8779	3.6819	0	0.597392	low
TCGA-B5-A11Q-01	2.67397	0	6.827	2.5764	2.5764	2.1567	2.0569	7.5922	0	0	3.2133	0.790338	high
TCGA-B5-A11R-01	6.43562	0	3.7871	5.9932	0.9131	7.4655	2.4371	6.788	3.5896	2.9304	1.4679	0.604346	low
TCGA-B5-A11S-01	6.10685	0	4.3836	6.5131	0.9285	6.1407	0	11.2241	0	6.5963	4.183	0.482349	low
TCGA-B5-A11U-01	1.39452	0	0.983	2.9701	0.983	2.5565	0	7.9771	3.9679	0.983	3.7756	0.803805	high
TCGA-B5-A11V-01	1.63014	0	4.6697	7.8561	0	6.087	5.2152	12.5554	3.7822	5.4438	3.2487	0.411702	low
TCGA-B5-A11W-01	1.62466	0	5.8893	3.0503	0	8.1861	7.8255	9.7886	0	2.368	5.2258	0.453689	low
TCGA-B5-A11X-01	1.63288	0	0	2.7578	7.2185	0	0	2.9494	0	2.5368	0	1.4798	high
TCGA-B5-A11Y-01	1.53425	0	4.7769	4.3124	0	6.4968	5.02	8.0845	0	1.175	3.2935	0.517638	low
TCGA-B5-A11Z-01	1.44658	0	5.4633	10.6011	1.5033	6.0898	3.6768	9.7462	1.5033	8.6801	2.4821	0.380751	low
TCGA-B5-A121-01	1.38082	0	2.7472	7.2009	0	8.3447	7.4835	11.1066	0	6.7098	5.5708	0.341124	low
TCGA-B5-A1MR-01	18.7918	0	0	0	4.0064	4.0064	0	1.2449	1.2449	2.9728	0	1.2934	high
TCGA-B5-A1MS-01	8.52603	1	1.0339	1.261	0.4321	0.7641	0	2.6409	5.7753	0	1.4572	0.998952	high
TCGA-B5-A1MU-01	4.2411	1	2.5505	2.0837	0	0	0	0.8558	3.4218	2.5505	0	0.863858	high
TCGA-B5-A1MV-01	4.28767	0	5.8496	3.1668	0	7.7474	6.4127	6.8865	1.3764	0.8465	2.7195	0.548996	low
TCGA-B5-A1MW-01	1.22466	0	1.0663	2.6102	0	3.9957	0	5.6081	2.3253	1.0663	0.7903	0.803629	high
TCGA-B5-A1MX-01	4.03562	0	0.7925	9.5785	0	4.8851	2.7775	8.2024	0.7925	1.3011	1.3011	0.479852	low
TCGA-B5-A1MY-01	0.989041	0	1.0638	0	2.0947	6.0299	4.8208	7.9254	6.3714	2.4228	1.0638	0.994773	high
TCGA-B5-A1MZ-01	4.37808	0	6.5782	10.0479	3.0346	4.4971	0	11.4483	0	3.2051	3.2051	0.519357	low
TCGA-B5-A1N2-01	2.6137	1	0	0	0.9501	0	0	2.5008	2.9115	1.9244	0.9501	1.05425	high
TCGA-B5-A3F9-01	11.3836	0	4.8742	6.4992	0	4.7729	0	13.3679	0.5821	1.8011	3.4515	0.513862	low
TCGA-B5-A3FA-01	8.02466	0	2.3133	0.5814	1.5778	1.7997	0	1.9919	3.1603	0.5814	1.3155	1.04816	high
TCGA-B5-A3FB-01	7.79178	0	2.2538	2.5476	0	6.2245	0	5.7343	2.7915	1.6572	1.0545	0.766134	high
TCGA-B5-A3FC-01	5.9863	0	2.5069	9.5414	0	2.35	0	12.1619	0	0.6649	3.795	0.463801	low
TCGA-B5-A3FD-01	3.27945	1	2.3284	6.2272	0.5877	2.6782	0.1772	12.2086	0	3.3997	5.3117	0.519119	low
TCGA-B5-A3FH-01	2.30411	0	3.6209	5.7534	0	5.8308	4.0927	7.0879	1.4775	1.1308	3.4742	0.515109	low
TCGA-B5-A3S1-01	2.47123	0	0.7366	0	2.1147	1.2218	0	4.8235	5.533	0	2.1147	1.19214	high
TCGA-B5-A5OC-01	3.42192	0	6.944	3.7189	1.4868	1.889	0	10.1761	0.927	3.3873	0.5367	0.731519	high
TCGA-B5-A5OD-01	2.84384	0	0.4786	0.8374	0.4786	0	0.8374	3.3288	3.2712	1.569	0	0.983927	high
TCGA-B5-A5OE-01	2.91233	0	0.9198	0	5.9321	1.1305	0	0.3755	7.7957	1.6235	1.4771	1.71857	high
TCGA-BG-A0LW-01	1.55068	0	4.1647	9.0319	0.8849	6.449	5.2253	10.7727	0	9.3149	0.8849	0.388272	low
TCGA-BG-A0LX-01	1.68219	0	2.5753	7.8506	0	6.8151	5.9773	8.3445	3.7442	1.7991	3.912	0.446012	low
TCGA-BG-A0M0-01	1.61096	0	1.5583	8.3437	0	5.0903	0	11.8279	0	3.9624	5.7419	0.42671	low
TCGA-BG-A0M2-01	1.74521	0	3.0017	9.8015	0	7.1884	6.5969	11.2693	0	2.5041	4.4613	0.347292	low
TCGA-BG-A0M3-01	2.93425	0	6.9172	7.2665	0	3.1685	2.1456	11.6948	0	1.0987	3.9855	0.455132	low
TCGA-BG-A0M4-01	5.93699	0	1.7984	0	0	6.305	5.2545	6.6984	5.2069	2.238	4.1976	0.71964	high
TCGA-BG-A0M6-01	1.83836	1	0.9449	0	0.9449	1.9166	1.511	0.9449	3.597	0	2.2328	1.00143	high
TCGA-BG-A0M7-01	5.30685	0	2.9885	3.7779	0	5.3329	4.1031	11.246	0	2.1597	4.9022	0.518332	low
TCGA-BG-A0M9-01	6.21918	0	5.7538	8.3492	0	7.7922	6.9088	9.0026	1.979	4.6169	3.9737	0.361472	low
TCGA-BG-A0MA-01	0.893151	1	1.8895	7.0218	3.038	5.3777	4.7141	11.8465	0.9273	4.4422	4.3811	0.552272	low
TCGA-BG-A0MC-01	3.46027	0	3.6259	4.9152	0	8.2172	7.5373	11.1608	2.0846	4.354	5.8512	0.4146	low
TCGA-BG-A0MG-01	4.04658	0	2.1812	0	0	6.4434	5.184	6.9213	0	2.785	3.2093	0.660037	high
TCGA-BG-A0MI-01	1.95616	1	4.2105	9.7566	0	4.8199	2.7736	11.4204	0	1.5588	2.2904	0.42208	low
TCGA-BG-A0MK-01	3.60822	1	3.0489	9.8406	0	7.9643	5.2589	11.6621	0	3.3356	2.3485	0.374905	low
TCGA-BG-A0MO-01	3.5863	0	7.0717	12.3422	0	2.1548	0	13.1134	1.1051	5.3676	0	0.388035	low
TCGA-BG-A0MQ-01	4.97808	0	1.6868	8.0322	2.7112	3.5966	2.4433	11.8194	2.1141	2.4433	3.1322	0.612475	low
TCGA-BG-A0MT-01	1.76438	0	0	5.1287	0	0.8872	0	7.4526	0	1.8274	4.6316	0.597932	low
TCGA-BG-A0MU-01	1.69041	0	4.2242	12.1325	1.029	3.2211	0	12.4397	2.0432	6.7983	0	0.438265	low
TCGA-BG-A0RY-01	1.28493	0	5.1505	1.5996	0	4.108	3.3416	4.0204	3.0191	1.5996	1.5996	0.717939	high
TCGA-BG-A0VT-01	4.29589	0	7.1776	10.2569	1.0461	3.2509	0	12.8176	0	6.0201	4.6105	0.387013	low
TCGA-BG-A0VV-01	4.25479	0	5.8159	7.7702	0	6.8288	5.8159	12.065	0	5.0959	3.0076	0.375995	low
TCGA-BG-A0VW-01	4.33425	0	3.2419	7.2601	0	7.6364	7.1612	10.2498	0	4.4131	3.8616	0.383306	low
TCGA-BG-A0VX-01	2.85753	0	4.7207	3.3779	0	5.3716	4.0029	11.8562	0	2.5104	5.719	0.497631	low
TCGA-BG-A0VZ-01	4.3863	0	4.626	3.2081	0	6.0866	4.7962	9.9452	2.8441	4.3626	4.1278	0.528599	low
TCGA-BG-A0W1-01	4.40274	0	1.0638	11.4327	0	7.8455	7.3337	11.7783	0	4.8755	4.5116	0.301906	low
TCGA-BG-A0W2-01	4.71507	0	4.4316	6.8703	0	6.7437	5.9827	11.9482	0	3.3722	4.7146	0.394266	low
TCGA-BG-A0YU-01	1.23562	0	4.6652	6.1047	0	9.3573	8.2126	12.3309	0	5.0352	3.6618	0.377925	low
TCGA-BG-A0YV-01	1.04658	0	0	0	1.4259	4.4651	0	5.083	2.1289	0.8824	1.4259	1.03788	high
TCGA-BG-A186-01	1.14795	0	4.5229	10.8445	0	3.969	0	12.0601	1.6296	2.0501	4.5872	0.402261	low
TCGA-BG-A187-01	1.2274	0	2.5414	4.5348	0	8.1376	6.6895	12.1125	0	3.858	3.6521	0.459119	low
TCGA-BG-A18A-01	1.16712	0	3.1815	6.1214	0	7.7812	6.9078	12.2467	2.0098	6.1421	4.1822	0.403341	low
TCGA-BG-A18B-01	1.28767	0	3.3843	10.6723	0.8941	7.4603	6.5234	13.1026	0	6.1401	1.838	0.355685	low
TCGA-BG-A18C-01	1.28767	0	5.258	4.6414	0	1.8726	0	8.1455	5.4163	1.8726	3.542	0.646008	low
TCGA-BG-A222-01	0.79726	0	0.8621	2.7492	3.198	5.7805	4.2471	3.5397	3.7295	1.7879	1.398	0.926195	high
TCGA-BG-A2AD-01	1.66849	0	0	0	5.9792	3.7022	0	0	5.693	0	1.5863	1.69922	high
TCGA-BG-A2AE-01	1.97534	0	2.8668	1.7486	1.7486	4.753	3.3842	0.8374	2.3027	2.0521	1.3638	0.845116	high
TCGA-BG-A2L7-01	1.67671	0	2.1343	5.4942	0	3.6206	0	6.5142	0	1.0909	2.1343	0.615649	low
TCGA-BG-A3EW-01	0.942466	0	2.4255	0	3.189	4.2086	0	5.8924	3.3742	1.357	0	1.23488	high
TCGA-BG-A3PP-01	1.86575	0	4.7571	0	0	0.6149	0	2.2388	5.4435	1.3754	0	0.98952	high
TCGA-BK-A0C9-01	2.99178	0	3.5804	10.5191	0	7.4726	6.3682	13.3577	0	4.3567	3.5804	0.325964	low
TCGA-BK-A0CA-01	2.91507	0	3.2138	1.409	0	9.0225	7.5004	9.1007	0	4.7367	0.8701	0.571606	low
TCGA-BK-A0CB-01	2.99178	0	3.3783	6.988	0	3.0907	2.5108	10.9315	3.0907	4.0034	4.7717	0.470117	low
TCGA-BK-A0CC-01	2.92329	0	0	0	0	0	0	1.6695	0	1.0638	0	0.970797	high
TCGA-BK-A139-01	2.58356	1	0.9249	0.9249	3.1837	3.6645	0	1.4838	1.8857	1.4838	1.4838	1.12745	high
TCGA-BK-A13B-01	2.64658	0	6.4454	7.5048	1.3036	1.9771	0.5748	9.6767	1.3036	4.6429	0.9848	0.561575	low
TCGA-BK-A13C-01	2.08219	0	0.9764	4.4141	0	8.1718	6.5968	8.1766	0.9764	0	0.9764	0.586067	low
TCGA-BK-A26L-01	2.01096	0	0	0	0.8558	0.8558	0	1.3892	2.3359	1.3892	1.7778	1.01365	high
TCGA-BK-A4ZD-01	1.3863	0	4.4154	0.7666	0	0	0	11.9846	0	0	1.2646	0.822833	high
TCGA-BK-A56F-01	1.09863	0	3.899	5.065	0	6.9263	3.2381	11.2384	2.5996	4.8498	1.4261	0.536084	low
TCGA-BK-A6W3-01	0.835616	0	2.5185	6.4335	0	4.059	0	9.0316	1.4718	0.3736	1.8721	0.605987	low
TCGA-BK-A6W4-01	0.821918	0	4.7148	4.2032	0	5.2974	0	10.0031	2.0174	5.4051	0.5216	0.617211	low
TCGA-BS-A0T9-01	3.91233	1	1.6828	5.2698	1.074	2.932	2.1096	5.5335	4.3067	2.1096	3.9419	0.657697	high
TCGA-BS-A0TA-01	2.0274	1	3.1815	1.0065	0	6.8331	6.3879	5.7677	0	2.8185	0	0.666553	high
TCGA-BS-A0TC-01	7.12877	0	3.1779	5.675	0	8.125	7.2747	10.856	0	1.881	2.4521	0.460653	low
TCGA-BS-A0TD-01	6.51781	0	5.0469	2.1896	0	7.8722	7.0625	8.5126	1.4756	1.8763	3.7513	0.541492	low
TCGA-BS-A0TE-01	0.4	1	1.5548	1.5548	1.5548	0	0	9.3144	1.5548	1.5548	2.7685	0.896241	high
TCGA-BS-A0TG-01	6.49589	0	0	4.8957	0	0	1.8541	5.421	2.2995	2.6393	4.1698	0.612427	low
TCGA-BS-A0TI-01	5.15616	0	5.0899	3.885	0	3.4845	3.335	9.1369	0	2.7026	5.4033	0.505405	low
TCGA-BS-A0TJ-01	5.66575	0	1.355	6.5737	0.8311	2.6899	0	4.2998	3.0019	1.355	3.2583	0.649258	high
TCGA-BS-A0U5-01	8.0411	0	4.6941	7.3123	0	7.8971	7.0034	6.2775	1.5431	2.9449	4.7465	0.392192	low
TCGA-BS-A0U7-01	2.56164	1	4.0392	5.8635	0	6.013	4.8201	8.7893	0.9323	2.212	1.8972	0.505542	low
TCGA-BS-A0U8-01	8.11781	0	2.1204	8.1465	0	2.9442	0	12.6311	2.9442	3.8473	3.3116	0.501657	low
TCGA-BS-A0U9-01	7.73973	0	0	2.6851	0.9299	0	0	2.8751	3.8657	1.8936	0	0.956093	high
TCGA-BS-A0UA-01	9.57534	0	3.3909	7.5303	0	6.8588	5.9425	11.1983	1.1284	0	3.6851	0.442647	low
TCGA-BS-A0UF-01	7.15342	0	1.3714	6.0287	0	4.0071	2.0616	5.6268	1.3714	2.3128	2.0616	0.575653	low
TCGA-BS-A0UJ-01	6.86575	0	4.2386	4.3215	0	6.1118	6.2453	9.2525	0	1.0822	4.962	0.478406	low
TCGA-BS-A0UL-01	6.79726	0	3.0676	6.0153	2.2301	2.1026	2.0586	10.5237	2.2301	3.7003	3.7003	0.631046	low
TCGA-BS-A0UM-01	7.24384	0	4.8839	8.998	0	7.5667	6.4621	10.7285	2.0599	5.0993	2.5247	0.370877	low
TCGA-BS-A0UT-01	6.06027	0	1.8696	3.8351	0	1.8696	0	5.15	1.8696	5.0379	2.6573	0.643845	low
TCGA-BS-A0UV-01	6.10411	0	0	6.6058	2.7745	5.5473	3.665	2.9664	3.964	0.9809	0.9809	0.775327	high
TCGA-BS-A0V4-01	4.9589	0	5.0451	6.3529	0	0	0	11.4671	4.0279	0	3.6013	0.600596	low
TCGA-BS-A0V6-01	7.46575	0	7.5173	4.0961	0	6.7966	6.3638	11.6946	0	4.2324	2.6052	0.457307	low
TCGA-BS-A0V7-01	5.29863	0	5.1146	4.5503	0	0	0	11.1378	0	0	4.5503	0.592844	low
TCGA-BS-A0V8-01	6.96986	0	2.0499	2.5138	0	1.362	1.362	9.9148	3.3817	1.362	3.7617	0.709766	high
TCGA-BS-A0VI-01	7.24932	0	3.8781	3.3414	0	1.3349	0	8.3592	3.3414	2.0162	0	0.768984	high
TCGA-BS-A0WQ-01	5.53973	0	3.5099	4.5014	0	4.8864	5.0835	10.8546	2.8201	3.1365	2.1583	0.550914	low
TCGA-D1-A0ZN-01	1.40274	0	6.2979	6.7121	0	4.8065	3.6378	10.4453	0.8621	5.7588	3.198	0.42534	low
TCGA-D1-A0ZO-01	1.64932	0	4.5599	9.7244	0	9.0939	7.9542	12.11	0.877	4.3976	3.76	0.322463	low
TCGA-D1-A0ZP-01	2.49589	0	1.7328	1.35	4.348	1.35	0.8275	5.5925	0.8275	0	0.8275	1.22491	high
TCGA-D1-A0ZQ-01	0.712329	0	2.7523	9.3022	0	4.1979	1.3219	9.7274	1.4002	4.3696	3.3243	0.432162	low
TCGA-D1-A0ZR-01	0.0465753	0	3.4594	8.4169	0	9.8895	8.7699	9.9381	2.8387	7.506	2.0275	0.355355	low
TCGA-D1-A0ZS-01	0.405479	0	0.79	1.2977	0	4.2652	1.9696	1.9696	3.3894	3.0516	0	0.837009	high
TCGA-D1-A0ZU-01	2.38904	0	3.7291	8.0224	0	6.4653	4.9842	9.9472	2.6699	3.6432	5.21	0.398742	low
TCGA-D1-A0ZV-01	1.99452	0	2.8759	6.1446	0	7.2419	6.4881	9.1452	0.9304	2.8759	2.2089	0.468291	low
TCGA-D1-A0ZZ-01	1.87945	0	0	2.3481	4.6752	3.0672	3.0615	9.0644	2.0954	0	0	1.18935	high
TCGA-D1-A101-01	0.145205	0	4.4507	8.3736	0	2.8375	3.217	11.0832	2.8915	3.6131	3.9492	0.436102	low
TCGA-D1-A102-01	0.369863	0	6.2417	8.2384	0	7.4059	6.1192	11.9159	1.7266	9.3218	3.2431	0.335741	low
TCGA-D1-A103-01	1.83288	0	3.2389	7.6084	0	4.9862	0	8.6902	0	1.7234	2.4865	0.515122	low
TCGA-D1-A15V-01	3.29041	0	0	0	0.7725	1.9384	0	0.7725	4.9087	1.2729	1.2729	1.07222	high
TCGA-D1-A15W-01	2.50685	0	4.3431	5.5066	0	6.3932	5.0391	9.1628	0.8788	0.8788	3.096	0.501709	low
TCGA-D1-A15X-01	2.49041	0	2.5134	0	2.0495	1.7462	0	2.3	0	0	0	1.11778	high
TCGA-D1-A15Z-01	0.158904	1	3.3761	4.9035	0	2.859	2.0452	8.4008	2.5087	2.859	2.2955	0.595168	low
TCGA-D1-A160-01	0.306849	0	4.2084	2.4254	0	2.653	2.4716	10.0137	0	0	1.6717	0.68779	high
TCGA-D1-A161-01	2.44384	0	6.4599	8.4918	0	7.1197	6.2852	10.9199	0	2.1201	2.9438	0.379506	low
TCGA-D1-A162-01	3.13699	0	3.9455	8.0194	0	6.7966	5.4387	11.2259	0	2.7933	2.9597	0.407758	low
TCGA-D1-A163-01	2.71507	0	3.7079	6.1165	0	4.344	0	9.3358	4.2856	0	3.1771	0.614603	low
TCGA-D1-A165-01	0.0547945	0	3.9474	9.5856	1.4872	7.781	6.2113	12.6992	0	4.1069	3.7681	0.387797	low
TCGA-D1-A167-01	1.30959	0	0	0.8526	0.8526	4.0973	0	0	1.7729	0.8526	0	1.00567	high
TCGA-D1-A168-01	3.00822	0	0	1.0541	0	2.0804	0	2.8989	6.5144	2.674	0	0.982264	high
TCGA-D1-A169-01	3.10959	0	2.7168	9.5724	0	5.8544	4.8516	9.4785	1.6914	2.1192	3.8458	0.399941	low
TCGA-D1-A16B-01	3.03014	0	3.4573	5.5726	0	4.808	3.962	9.18	2.7705	4.8306	5.5212	0.461077	low
TCGA-D1-A16D-01	3.12603	0	4.0984	7.684	0	6.7529	0	9.5833	0	3.0102	3.5956	0.464814	low
TCGA-D1-A16E-01	3.06575	0	2.9008	3.3065	0	7.7661	6.3832	6.6961	1.7764	3.0491	3.1836	0.538951	low
TCGA-D1-A16F-01	0.219178	0	4.1272	1.4511	1.4511	8.2043	7.1339	8.1123	0.9008	3.8947	2.4156	0.637556	low
TCGA-D1-A16G-01	2.28493	1	0	0.9514	3.0823	2.503	0	6.9131	3.7157	0.9514	0	1.23903	high
TCGA-D1-A16I-01	0.958904	1	0	2.0911	1.3952	1.3952	1.3952	3.4305	4.7594	4.362	0	0.942021	high
TCGA-D1-A16J-01	2.49315	0	1.566	0.9858	5.2201	4.9266	4.4322	5.0167	2.975	1.566	2.975	1.11995	high
TCGA-D1-A16N-01	2.58904	0	4.1735	3.5564	4.1735	3.3177	0.9238	7.5652	2.6741	1.4824	2.1979	0.960221	high
TCGA-D1-A16O-01	2.80274	0	5.2094	7.831	0	7.8854	6.7937	10.8823	0	0	4.4858	0.391351	low
TCGA-D1-A16Q-01	0.887671	0	5.3576	6.038	0	4.5455	4.2209	11.8769	1.7454	5.689	6.7713	0.396596	low
TCGA-D1-A16R-01	0.0575342	0	3.5225	10.0032	0	4.3943	0.0273	11.2079	0.9663	5.3596	4.1833	0.396943	low
TCGA-D1-A16S-01	1.55616	0	0	2.2106	1.1438	4.1811	3.2112	5.0729	4.9083	1.7736	3.4164	0.803208	high
TCGA-D1-A16V-01	0.328767	1	3.0487	6.9828	0	4.623	0	9.9623	3.8718	1.8984	1.495	0.593707	low
TCGA-D1-A16X-01	0.30411	0	1.7015	7.4832	0	7.2036	6.4172	11.9001	1.7015	4.3323	4.4852	0.399688	low
TCGA-D1-A16Y-01	1.45753	0	0	2.2958	0	0	0	3.9693	2.5577	0	0	0.914726	high
TCGA-D1-A174-01	1.6274	0	2.161	11.9653	0	5.2048	4.1046	14.6347	0	5.2493	2.161	0.340376	low
TCGA-D1-A175-01	0.553425	0	0.8354	11.6868	0	2.8628	0	11.011	2.6983	0	3.0106	0.465112	low
TCGA-D1-A176-01	2.51233	0	1.9435	9.9672	0	6.8196	5.3465	11.3712	1.9435	4.0162	4.0984	0.368015	low
TCGA-D1-A177-01	1.50137	0	1.9304	3.0871	0	5.4631	4.4342	11.9299	2.9185	1.5233	4.2332	0.594352	low
TCGA-D1-A179-01	1.2274	1	0	0	6.831	1.4521	0	0.9016	3.399	1.4521	2.823	1.64598	high
TCGA-D1-A17A-01	0.131507	0	2.0054	5.9613	0	7.4911	4.0934	5.592	0	2.3277	1.5898	0.522056	low
TCGA-D1-A17B-01	0.583562	0	1.5783	9.8619	0	8.0179	6.0775	12.499	0	3.161	4.9445	0.34343	low
TCGA-D1-A17C-01	0.0821918	0	3.5807	5.2585	1.068	4.1492	2.3476	11.5706	2.6966	7.1653	5.0355	0.512679	low
TCGA-D1-A17D-01	2.53699	0	1.1129	4.9102	0	7.5383	6.145	11.2378	3.1921	5.7049	4.0104	0.474104	low
TCGA-D1-A17F-01	0.106849	0	6.8412	5.0999	0	7.6076	6.8762	10.0601	1.1031	3.3483	2.152	0.456603	low
TCGA-D1-A17H-01	2.33425	0	0	11.0685	0	3.9074	0	7.6697	0.9514	1.5197	2.9138	0.457835	low
TCGA-D1-A17K-01	2.33973	0	2.2275	6.1494	1.9117	4.346	3.3516	10.7842	2.8964	1.5067	1.5067	0.672715	high
TCGA-D1-A17L-01	2.19726	0	0	9.3353	0	4.5109	2.4241	10.8212	0	1.7514	4.4004	0.432545	low
TCGA-D1-A17M-01	0.852055	0	5.5053	6.5377	1.3401	4.8365	0	12.0636	3.1142	2.0227	2.8333	0.609867	low
TCGA-D1-A17N-01	0.126027	0	3.8791	7.9533	0	6.9151	6.7071	13.3968	0	5.5585	6.9446	0.322461	low
TCGA-D1-A17Q-01	0.147945	0	0.954	9.3328	0	5.2308	4.4954	11.2463	2.2476	1.9304	2.9185	0.440013	low
TCGA-D1-A17R-01	0.928767	1	3.9547	7.3592	0	3.6765	0	12.9297	5.5339	3.4559	4.2579	0.519212	low
TCGA-D1-A17S-01	2.02466	0	4.0447	8.8836	0	7.8772	7.5473	12.4023	0	6.6246	0	0.369373	low
TCGA-D1-A17T-01	0.194521	0	4.5726	5.5109	0	7.0533	6.4791	10.6613	1.5764	6.7945	4.688	0.400874	low
TCGA-D1-A17U-01	1.90959	0	3.3407	9.413	0	7.6868	6.3194	10.2374	2.9337	2.3647	3.4543	0.390594	low
TCGA-D1-A1NS-01	0.117808	0	5.4141	4.9182	0	6.781	5.7825	9.592	0.9153	2.6589	4.3569	0.458381	low
TCGA-D1-A1NU-01	1.10137	0	0.8948	0	6.8704	1.4429	0.8948	1.4429	7.2502	1.8391	0	1.87335	high
TCGA-D1-A1NW-01	0.060274	0	1.6443	2.3928	5.2953	2.6588	0	6.409	4.4764	1.6443	2.0666	1.25328	high
TCGA-D1-A1NX-01	1.52055	0	1.9128	0.9425	0	6.6116	5.9287	5.7914	3.7975	2.7072	0.9425	0.722693	high
TCGA-D1-A1NY-01	1.40548	0	3.6227	3.5247	0.8547	4.6114	2.7353	2.0819	6.6148	1.7762	0	0.817252	high
TCGA-D1-A1NZ-01	1.50137	0	4.3958	2.7757	0	6.8088	5.9922	10.4412	0	4.7039	2.588	0.517603	low
TCGA-D1-A1O0-01	0.172603	0	1.4468	7.4179	1.4468	3.261	2.4217	6.5444	2.9826	1.4468	3.6111	0.597395	low
TCGA-D1-A1O5-01	1.25479	0	2.4947	5.1793	0	5.5042	5.1301	8.2837	0.9465	2.2354	4.8017	0.485448	low
TCGA-D1-A1O7-01	0.0876712	0	4.6813	4.8733	0	7.2536	6.4555	8.9488	2.2182	4.9176	3.8776	0.45223	low
TCGA-D1-A1O8-01	0.328767	1	0	4.5462	0	1.3771	0	5.2979	3.7845	9.2556	0	0.662179	high
TCGA-D1-A2G0-01	4.06575	0	0	0.6819	2.2096	1.4415	0.7663	5.6422	2.0076	0.6819	0	1.13015	high
TCGA-D1-A2G5-01	3.9863	0	5.0748	5.718	0	8.5521	6.9951	7.2277	0	4.2534	0	0.46781	low
TCGA-D1-A2G6-01	0.706849	1	2.8428	0	0	3.8196	0	0	8.1272	2.031	0	1.03766	high
TCGA-D1-A2G7-01	4.91233	1	0	4.6371	1.5414	2.9425	0	8.6588	2.2695	1.9508	1.9508	0.782607	high
TCGA-D1-A3DA-01	1.32329	0	3.4417	1.5256	0	4.8672	0	3.1677	1.7437	2.1004	0.5556	0.801285	high
TCGA-D1-A3DG-01	0.356164	1	6.2578	0.9335	3.7802	2.8815	0.9335	2.0651	5.6608	0	2.7896	1.14051	high
TCGA-D1-A3DH-01	1.56986	0	4.7618	0	0	0	0	1.3432	9.0959	1.0177	3.0309	0.973491	high
TCGA-D1-A3JQ-01	1.4411	0	0.7708	1.2705	3.8498	6.33	0	6.9111	3.0112	5.8095	1.7957	1.03274	high
TCGA-DF-A2KN-01	0.183562	0	1.9597	1.4068	0.4986	6.1281	1.1625	8.2848	2.8465	2.6706	0.8684	0.810909	high
TCGA-DF-A2KR-01	5.96712	0	0.598	5.3597	1.0195	3.7908	0	4.2065	2.4912	2.353	0.598	0.749772	high
TCGA-DF-A2KS-01	9.09041	0	0.8733	0	0	5.5191	0.9249	0.8733	5.9284	1.8056	0	0.988572	high
TCGA-DF-A2KU-01	8.40274	0	1.0837	5.6021	2.4535	2.298	0	2.1237	0	0	0	0.866777	high
TCGA-DF-A2KV-01	7.44384	0	1.1063	5.7711	0	3.3692	1.031	7.4848	0	2.985	2.758	0.562581	low
TCGA-DF-A2KY-01	0.909589	0	1.627	0	7.7206	0	0	2.5109	4.9432	1.3599	1.8524	1.86101	high
TCGA-DF-A2KZ-01	2.26301	0	5.1569	4.9084	0.8532	0	0	2.8976	1.3857	1.7737	0	0.741942	high
TCGA-DF-A2L0-01	2.1589	1	0	5.5184	0	2.5542	0	5.2858	5.2493	2.7757	0	0.739745	high
TCGA-DI-A0WH-01	1.3589	0	3.8621	2.3692	0	1.0298	0	4.0553	1.0298	1.6245	2.6342	0.726925	high
TCGA-DI-A1BU-01	3.27397	0	0	2.1918	0	1.9468	0	9.3296	6.2195	6.2469	2.5841	0.758772	high
TCGA-DI-A1BY-01	3.05205	0	3.6038	7.204	0	6.38	5.9301	9.3556	0	4.7062	5.2196	0.379051	low
TCGA-DI-A1C3-01	2.02466	0	3.9191	6.5881	0	1.5073	0	13.564	1.1561	1.5073	5.4185	0.507502	low
TCGA-DI-A1NN-01	2.94795	0	1.5199	1.5199	0	0.9515	0	1.9267	6.2425	0	0	1.00096	high
TCGA-DI-A1NO-01	0.780822	1	0	1.542	7.1547	1.8172	0.4267	0	3.6407	1.9516	0.9679	1.62916	high
TCGA-DI-A2QT-01	1.03288	1	0	1.1551	0.6902	0	0	3.0638	5.7649	0.6902	0	1.08555	high
TCGA-DI-A2QU-01	2.59178	1	3.2838	9.4281	1.1689	1.1689	0	8.067	3.0859	1.8061	0	0.615415	low
TCGA-DI-A2QY-01	9.17534	1	3.3455	1.0553	0	0	0.6221	7.4299	2.9009	1.3881	0.6221	0.863991	high
TCGA-E6-A1LX-01	1.94795	0	2.3312	10.7623	0	4.6688	1.4721	12.355	2.3312	1.5927	0	0.479853	low
TCGA-E6-A1LZ-01	6.59178	0	1.0841	0	3.8522	1.0841	0	1.6961	5.0163	2.7226	0	1.39203	high
TCGA-E6-A1M0-01	4.91233	0	1.3025	5.3691	0	4.6126	0.0105	7.7292	4.3784	1.3025	1.678	0.682737	high
TCGA-E6-A2P8-01	0.19726	1	0	0.6159	1.6461	0.6159	0	3.4039	1.3771	0	0.6159	1.09865	high
TCGA-E6-A2P9-01	3.79726	0	0.8916	4.6893	0.5136	5.8759	0	8.3083	0	2.9711	0	0.688716	high
TCGA-E6-A8L9-01	2.77534	0	3.5007	1.2673	0	2.3844	0	5.8042	4.083	1.2673	1.2673	0.855606	high
TCGA-EC-A1NJ-01	1.33699	0	5.1176	9.6622	0	5.6197	4.9022	10.7512	1.5493	0.9734	3.8567	0.390835	low
TCGA-EC-A1QX-01	0.613699	0	5.1295	6.5625	0	3.2482	2.3925	8.8787	2.0663	2.6584	3.5394	0.497915	low
TCGA-EC-A24G-01	1.4	0	1.7912	9.3165	0	7.6165	6.2097	10.2193	1.7912	2.9189	4.893	0.37089	low
TCGA-EO-A1Y5-01	0.909589	0	0.97	1.9547	6.262	0	0	1.5447	5.4642	0	0	1.66354	high
TCGA-EO-A1Y7-01	4.09589	0	1.024	7.7651	0.601	4.9769	0	6.9481	2.7409	1.8416	2.0359	0.597924	low
TCGA-EO-A1Y8-01	3.14247	0	4.2603	0	0	0	1.0065	1.0065	6.0789	1.5937	0	0.989215	high
TCGA-EO-A22R-01	5.14521	0	0.9727	6.1354	0	3.121	0	7.1546	1.5484	1.9588	0.9727	0.638098	low
TCGA-EO-A22S-01	5.12877	0	0	5.7649	0	4.4394	1.6684	7.6697	1.6684	1.6684	1.6684	0.616395	low
TCGA-EO-A22T-01	5.57534	0	0	1.7367	0.8299	5.7093	4.8185	7.5813	2.5022	3.9066	2.2892	0.713235	high
TCGA-EO-A22U-01	3.85479	0	0	10.6946	2.3905	0	0	9.506	0.9583	0.5573	1.2717	0.635572	low
TCGA-EO-A22X-01	4.8	0	1.2961	2.7703	3.9594	1.5562	0	0.9785	3.7671	1.2961	0	1.21043	high
TCGA-EO-A22Y-01	4.29315	0	4.2938	8.3027	0.509	6.6918	4.0577	6.2617	0.8845	6.7998	2.1324	0.420438	low
TCGA-EO-A2CG-01	4.28493	0	2.6819	4.1965	1.663	3.1017	0	9.2803	5.605	2.0876	2.0876	0.820354	high
TCGA-EO-A2CH-01	1.61644	1	2.4821	0	2.4821	3.4714	0	3.6923	4.7869	0.9392	0	1.22316	high
TCGA-EO-A3AS-01	2.86575	0	2.9525	1.5051	5.1423	2.0229	0	2.5614	3.1646	0	1.1543	1.35334	high
TCGA-EO-A3AU-01	4.2274	0	5.6124	5.1938	0	2.5899	0	9.0486	4.917	1.9025	0	0.690386	high
TCGA-EO-A3AV-01	2.92877	0	1.6421	1.0431	4.573	2.2364	0	2.656	0	0	2.7726	1.19727	high
TCGA-EO-A3AY-01	3.1726	0	0.6959	0	1.1634	2.0355	0	3.9316	3.0771	0	1.5159	1.06665	high
TCGA-EO-A3AZ-01	2.26301	0	1.3313	0	5.4161	0	0	0	2.0117	2.0117	0	1.53932	high
TCGA-EO-A3B0-01	3.86849	0	0	7.6065	0	2.1806	0	9.021	0	0	2.3147	0.579464	low
TCGA-EO-A3B1-01	2.24658	0	0.9943	0	0	0	0	0.5811	1.315	0.5811	0	0.995416	high
TCGA-EO-A3KU-01	1.85479	0	1.0399	0	2.0594	2.6508	0	2.9753	6.3723	0	1.3697	1.22452	high
TCGA-EO-A3KW-01	1.36164	0	3.1647	1.2544	5.9373	0.4291	0	2.1584	3.9906	1.0281	0.7594	1.4949	high
TCGA-EO-A3KX-01	3.20548	0	0	5.4357	1.2781	3.0225	1.2781	11.8509	4.1003	0.9635	2.7443	0.723304	high
TCGA-EO-A3L0-01	4.25753	0	3.9193	5.5385	0	3.3607	0	6.0711	5.7187	1.217	2.8443	0.652864	high
TCGA-EY-A1GC-01	4.51233	0	0.8718	9.4129	0	2.1111	1.8033	8.1373	2.3646	1.4115	0	0.546163	low
TCGA-EY-A1GD-01	4.49041	0	4.8563	6.1219	0	4.4716	3.2441	12.0947	0	4.9383	3.1089	0.454393	low
TCGA-EY-A1GE-01	2.03014	0	2.3205	10.2727	0	9.4873	8.1749	7.7861	0.8472	1.7643	2.069	0.366233	low
TCGA-EY-A1GF-01	2.26301	0	0	6.3749	0	8.3043	6.9727	11.1114	1.3828	3.6152	2.0757	0.468551	low
TCGA-EY-A1GH-01	1.94521	0	5.3637	2.4284	0	7.4679	6.5953	9.8035	0	1.2992	3.0539	0.541897	low
TCGA-EY-A1GI-01	1.94521	0	5.6515	8.2917	0	6.0669	3.7633	12.5856	0	3.2305	3.2305	0.400912	low
TCGA-EY-A1GK-01	1.89863	0	1.5735	9.1776	0	7.4586	6.3924	8.7642	0.9914	4.2316	0.9914	0.410692	low
TCGA-EY-A1GL-01	2.77808	0	0	4.9551	0	0.5773	0	5.387	5.6918	0.5773	0	0.822062	high
TCGA-EY-A1GM-01	2.72603	1	0	0	1.8991	7.0936	5.9104	6.931	7.3076	0	0	1.0736	high
TCGA-EY-A1GO-01	1.60548	0	6.2387	0	1.0565	1.6598	0	0	10.435	1.3895	0	1.16433	high
TCGA-EY-A1GP-01	1.56986	0	1.7133	4.1467	0.8153	2.1436	0	5.5879	4.1154	3.0386	1.5357	0.769156	high
TCGA-EY-A1GQ-01	1.49041	0	4.291	6.9277	0	2.3584	0	11.8964	1.0229	1.0229	0	0.600845	low
TCGA-EY-A1GR-01	1.46849	0	0.8409	2.8737	5.3419	2.0582	0	0	2.0582	1.3687	0	1.31397	high
TCGA-EY-A1GS-01	1.83562	1	0	1.0319	5.5211	3.0553	0	2.0475	1.0319	1.6273	0	1.43369	high
TCGA-EY-A1GT-01	1.34247	0	3.2136	0	2.0035	4.362	0	2.2516	2.6478	1.7037	2.6478	0.99682	high
TCGA-EY-A1GU-01	2.73151	1	1.7007	3.4266	3.2098	5.1803	0	8.5919	2.2482	0.8075	2.0003	0.941965	high
TCGA-EY-A1GV-01	1.31781	0	1.3373	0	5.1122	2.0191	0	2.0191	7.5371	1.3373	4.0239	1.44214	high
TCGA-EY-A1GW-01	0.923288	1	2.3207	9.7416	1.8733	6.5784	5.9292	5.259	2.9372	2.3207	1.2215	0.511892	low
TCGA-EY-A1GX-01	3.08767	1	1.1076	0.8237	0	6.1194	1.1076	3.693	0	1.5483	0	0.826866	high
TCGA-EY-A1H0-01	1.61096	0	4.5508	8.327	0	8.3403	7.4033	11.9248	0	6.8131	0.8056	0.366402	low
TCGA-EY-A210-01	1.04932	0	2.8268	0	0.5215	4.8727	0	1.6676	5.7462	0.9036	4.7143	0.88938	high
TCGA-EY-A212-01	0.849315	1	1.5197	2.2433	0.9514	1.9264	0	1.5197	3.0823	0.9514	3.2332	0.852316	high
TCGA-EY-A214-01	1.2	0	1.4772	6.6569	0	3.0244	0	2.449	0.92	2.449	3.8461	0.553975	low
TCGA-EY-A215-01	1.5726	0	0.9768	0	2.2847	6.1608	5.0298	5.0421	1.554	2.2847	1.554	0.911709	high
TCGA-EY-A2OM-01	1.90137	0	5.2008	3.6923	0	4.6354	0	4.2041	6.3034	3.2105	0	0.751933	high
TCGA-EY-A2ON-01	1.67123	1	0	1.758	1.1317	0	0	1.758	6.701	0	0	1.13289	high
TCGA-EY-A2OO-01	3.8137	0	0.9556	1.5255	2.2502	5.4197	1.2685	2.9214	7.1344	0	0.5555	1.13217	high
TCGA-EY-A2OP-01	2.5863	0	1.254	1.5093	0.9437	4.7471	0	1.7261	6.0262	2.2306	0	0.999	high
TCGA-EY-A2OQ-01	2.42466	0	0	0	1.4999	4.1992	0	5.1777	0.5431	0.5431	0	1.07357	high
TCGA-EY-A3L3-01	2.27945	0	0.9284	1.2355	0	0.5376	0	3.9067	4.5315	0.5376	0.5376	0.959107	high
TCGA-EY-A3QX-01	2.70959	1	2.1688	1.0349	4.3632	2.9987	0	3.7642	6.9592	0.4326	0	1.4425	high
TCGA-EY-A4KR-01	0.947945	1	1.4793	3.849	2.5649	0	0	1.6938	3.4375	0.5331	0.9214	1.00127	high
TCGA-EY-A547-01	1.49315	0	0	4.4179	8.0462	0	0	7.5101	2.8619	0	4.6458	1.36124	high
TCGA-EY-A548-01	1.17808	0	2.9475	12.1137	0	2.4895	0	14.2835	1.1756	0.5055	3.6724	0.409238	low
TCGA-EY-A549-01	1.65753	0	2.8315	10.102	2.8315	6.7747	4.3341	10.491	0.4935	2.8315	2.988	0.488483	low
TCGA-EY-A54A-01	1.22466	0	0.4969	0.4969	1.4031	0.4969	0	1.1594	5.9315	1.6116	0.8658	1.134	high
TCGA-EY-A5W2-01	1.4137	0	1.5234	5.5809	0	1.7188	2.1151	10.121	2.5076	0.954	3.0054	0.602325	low
TCGA-EY-A72D-01	0.490411	0	2.6724	1.2829	0.4418	0.4418	0	1.0531	4.9588	0	3.0297	0.915271	high
TCGA-FI-A2CX-01	5.56438	0	1.8848	2.6749	0.9243	2.1987	1.8848	7.9323	0	14.9455	0	0.591013	low
TCGA-FI-A2CY-01	5.69863	0	0.8247	0	3.4628	0.8247	0	0	7.2048	0.8247	0.8247	1.44351	high
TCGA-FI-A2D0-01	3.32329	0	3.437	0	0.9212	3.437	0	4.2383	4.6513	1.4789	2.1936	0.963681	high
TCGA-FI-A2D2-01	6.44384	1	1.5171	0	0.9494	1.5171	0	2.7195	0.9494	0.9494	3.2296	0.923555	high
TCGA-FI-A2D4-01	0.665753	1	0	7.1107	1.676	1.676	0	12.9739	2.4305	0	3.2901	0.689223	high
TCGA-FI-A2D5-01	1.15342	1	0.92	0	0.92	3.7537	0	0	0	2.8569	0	0.967573	high
TCGA-FI-A2D6-01	2.10137	1	1.3951	0	8.2488	0.86	0	0.86	7.6191	1.3951	0.86	2.12427	high
TCGA-FI-A2EU-01	8.05753	0	0	2.2126	6.5073	0	0	0	3.6797	2.4709	0	1.56122	high
TCGA-FI-A2EW-01	4.91781	0	1.3813	2.5399	2.0739	4.6483	4.0918	0	4.0918	3.4102	2.5399	0.80988	high
TCGA-FI-A2EX-01	0.778082	0	0.9879	0	2.7866	0.9879	0	0.9879	7.9814	0	0	1.44009	high
TCGA-FI-A2EY-01	2.41096	1	2	0	4	0	0	3.9069	5	2	0	1.41443	high
TCGA-FI-A2F4-01	6.10959	0	0.9175	5.4188	0	4.1084	1.3385	9.4115	1.4739	0	1.8745	0.639214	low
TCGA-FI-A2F8-01	2.55616	0	1.6827	2.1095	0	2.4237	2.4531	6.1421	3.8341	2.1095	0	0.805072	high
TCGA-FI-A2F9-01	4.93973	0	0	1.1935	0	4.516	0	1.1935	1.1935	1.1935	1.8375	0.839455	high
TCGA-FI-A3PV-01	3.42192	1	2.1385	6.0581	5.867	2.5512	0.5715	9.7669	1.7785	1.5581	1.5581	1.00763	high
TCGA-FI-A3PX-01	6.53151	0	1.2195	0.9151	1.2195	0	0	2.1836	0.529	2.3178	0.529	0.967347	high
TCGA-JU-AAVI-01	1.47945	1	0.8107	1.3267	4.467	0	0	2.2542	4.8903	0	2.2542	1.35368	high
TCGA-K6-A3WQ-01	1.16986	1	3.7385	0.6199	0	1.0522	0	2.5439	5.3287	1.3843	0	0.964631	high
TCGA-KP-A3VZ-01	1.97808	0	0	0.5257	3.6857	2.0275	0	2.3092	3.7342	0.91	0	1.36331	high
TCGA-KP-A3W0-01	1.10685	0	0.9125	0.9125	0	0.5273	0	1.8667	5.1097	2.3134	0	0.973665	high
TCGA-KP-A3W1-01	0.789041	0	1.0358	3.6498	0	0	0	1.0358	2.3787	1.0358	1.0358	0.793442	high
TCGA-KP-A3W3-01	2.17534	0	3.8086	2.1288	0	0.5674	0	3.8574	5.3405	1.2903	0.5674	0.871843	high
TCGA-KP-A3W4-01	1.51781	1	2.8627	1.7824	0	3.3309	0	4.2574	1.7824	1.6282	1.2595	0.794511	high
TCGA-PG-A5BC-01	1.93699	0	1.7151	4.3348	0.9361	3.2744	0	7.6412	0.5426	0	1.2448	0.762365	high
TCGA-PG-A6IB-01	1.77534	0	2.474	0	4.2648	0	0	6.1437	1.9005	0.5416	1.2429	1.32739	high
TCGA-PG-A7D5-01	3.22466	0	0	0.4748	7.0093	6.1208	3.5263	5.9126	5.4931	2.1723	0.4748	1.56443	high
TCGA-PG-A914-01	1.88219	0	0.4664	0.4664	6.1233	0.7047	0.1809	2.2682	8.8897	0.4664	0	1.87757	high
TCGA-PG-A915-01	0.682192	0	1.1366	1.1366	0	0.4849	0	0.8472	1.7643	0	0	0.949132	high
TCGA-PG-A916-01	1.43014	0	5.6607	9.0929	0	7.8044	2.3124	9.095	0	2.1923	1.3712	0.432821	low
TCGA-PG-A917-01	0.580822	0	4.0633	8.5631	1.8914	3.0083	1.0594	11.5997	0	2.4158	2.2612	0.551191	low
TCGA-QF-A5YS-01	1.88767	0	2.1852	8.1878	0	0.4033	0	9.1283	3.7971	1.3855	2.5454	0.570797	low
TCGA-QF-A5YT-01	3.32877	0	3.0365	3.532	0.9714	2.2758	0	7.5827	0.9714	3.6471	4.267	0.661403	high
TCGA-QS-A5YQ-01	2.07945	0	3.4177	7.9724	0	4.6399	3.3387	12.9678	0.6506	4.9369	5.8575	0.38426	low
TCGA-QS-A5YR-01	1.96986	0	4.1686	7.399	0.599	6.1909	2.7358	10.0963	1.021	2.3554	3.3595	0.485125	low
TCGA-QS-A744-01	1.23562	0	1.5047	1.6526	0	5.1788	0	6.9803	3.2594	0.6894	0	0.874574	high
TCGA-QS-A8F1-01	0.369863	1	0	2.5153	4.1934	0	0	0	8.77	0	1.3631	1.40741	high
TCGA-SJ-A6ZI-01	1.72877	0	3.9933	1.8022	0	4.3196	0	7.6371	2.4204	1.6675	3.9648	0.704511	high
TCGA-SJ-A6ZJ-01	1.52329	0	5.627	4.9511	0	6.0185	2.9265	12.4522	0	6.3182	5.7263	0.421324	low
