# Supplementary material for: A stemness-based signature with inspiring indications in discriminating the prognosis, immune response, and somatic mutation of endometrial cancer patients revealed by machine learning
Source: publisher site journal article supplement (doi:10.18632/aging.205979), 2024-07-30
Supplement: Supplementary file [file aging-v16i14-205979-supplementary-material-SD2.pdf]

## SUPPLEMENTARY TABLES

**Supplementary Table 1. Characteristics of patients in TCGA and cohort in our hospital.**

| Variables                  | TCGA          | Validation   |
|----------------------------|---------------|--------------|
|                            | Mean + SD     | Mean + SD    |
| OS (day)                   | 999.3 ± 854.5 | 1562 ± 683.6 |
| Age (year)                 | 64.2 ± 11.0   | 60.7 ± 15.2  |
| Living status              | <i>N</i> (%)  | <i>N</i> (%) |
| Alive                      | 343 (82.4%)   | 16 (66.7%)   |
| Death                      | 73 (17.5%)    | 8 (33.3%)    |
| <b>Diabetes</b>            |               |              |
| No                         | 286 (68.8%)   | 17 (70.8%)   |
| Yes                        | 130 (31.2%)   | 7 (29.2%)    |
| <b>Hypertension</b>        |               |              |
| No                         | 159 (38.2%)   | 12 (50.0%)   |
| Yes                        | 257 (61.8%)   | 12 (50.0%)   |
| <b>Menopausal status</b>   |               |              |
| Premenopausal status       | 66 (15.9%)    | 7 (29.2%)    |
| Postmenopausal status      | 350 (84.1%)   | 17 (70.8%)   |
| <b>Tumor grade</b>         |               |              |
| G1                         | 61 (14.7%)    |              |
| G2                         | 89 (21.4%)    | 19 (79.2%)   |
| G3                         | 266 (63.9%)   | 5 (20.8%)    |
| <b>FIGO stage</b>          |               |              |
| Stage I                    | 255 (61.3%)   | 13 (54.2%)   |
| Stage II                   | 42 (10.1%)    | 3 (12.5%)    |
| Stage III                  | 95 (22.8%)    | 6 (25.0%)    |
| Stage IV                   | 24 (5.8%)     | 2 (8.4%)     |
| <b>Histological type</b>   |               |              |
| EEA                        | 301 (72.4%)   | 21 (87.5%)   |
| Other types                | 115 (27.6%)   | 3 (12.5%)    |
| <b>Recurrence</b>          |               |              |
| No                         | 331 (79.6%)   | 12 (50.0%)   |
| Yes                        | 85 (20.4%)    | 12 (50.0%)   |
| <b>Peritoneal cytology</b> |               |              |
| Negative                   | 344 (82.7%)   | 18 (75.0%)   |
| Positive                   | 72 (17.3%)    | 6 (25.0%)    |
| <b>LNM</b>                 |               |              |
| Negative                   | 302 (72.6%)   | 19 (79.17%)  |
| Positive                   | 114 (27.4%)   | 5 (20.83%)   |

Abbreviations: TCGA: The Cancer Genome Atlas; OS: overall survival; SD: standard deviation; G: grade; EEA: endometrioid endometrial adenocarcinoma; LNM: lymph node metastasis. In histological types, the other type includes serous endometrial adenocarcinoma and mixed serous and endometrioid.

**Supplementary Table 2. Seven genes and corresponding coefficient value in LASSO regression.**

| <b>Gene names</b> | <b>Coefficient</b> |
|-------------------|--------------------|
| ART3              | -0.0107606         |
| C1orf64           | -0.0524939         |
| FOXD3             | 0.081842           |
| FRMPD2            | -0.0075949         |
| FRMPD2L1          | -0.0223019         |
| IHH               | -0.0060432         |
| LMO1              | 0.01754824         |
| SERPIND1          | -0.0166729         |
| TMEM114           | -0.0305824         |

**Supplementary Table 3. Multivariate logistic regression analysis of the seven genes selected by multiple machine learning algorithms.**

| <b>Variable</b> | <b>B</b> | <b>HR (95%CI)</b>   | <b>p-value</b> |
|-----------------|----------|---------------------|----------------|
| ART3            | -1.120   | 0.810 (0.719–0.912) | 5.28E-04       |
| C1orf64         | -0.763   | 0.845 (0.786–0.908) | 5.28E-06       |
| FOXD3           | 0.868    | 1.237 (1.129–1.354) | 4.33E-06       |
| FRMPD2          | -0.621   | 0.833 (0.761–0.912) | 8.02E-05       |
| IHH             | -0.263   | 0.880 (0.834–0.929) | 4.40E-06       |
| LMO1            | 0.528    | 1.158 (1.073–1.251) | 1.65E-06       |
| TMEM114         | -1.434   | 0.753 (0.656–0.865) | 5.82E-05       |
